# Supplementary material for: Length-mass relationships of pond macroinvertebrates do not hold between Southern and Northern Europe
Source: PeerJ journal article supplement (doi:10.7717/peerj.18576), 2024-12-16

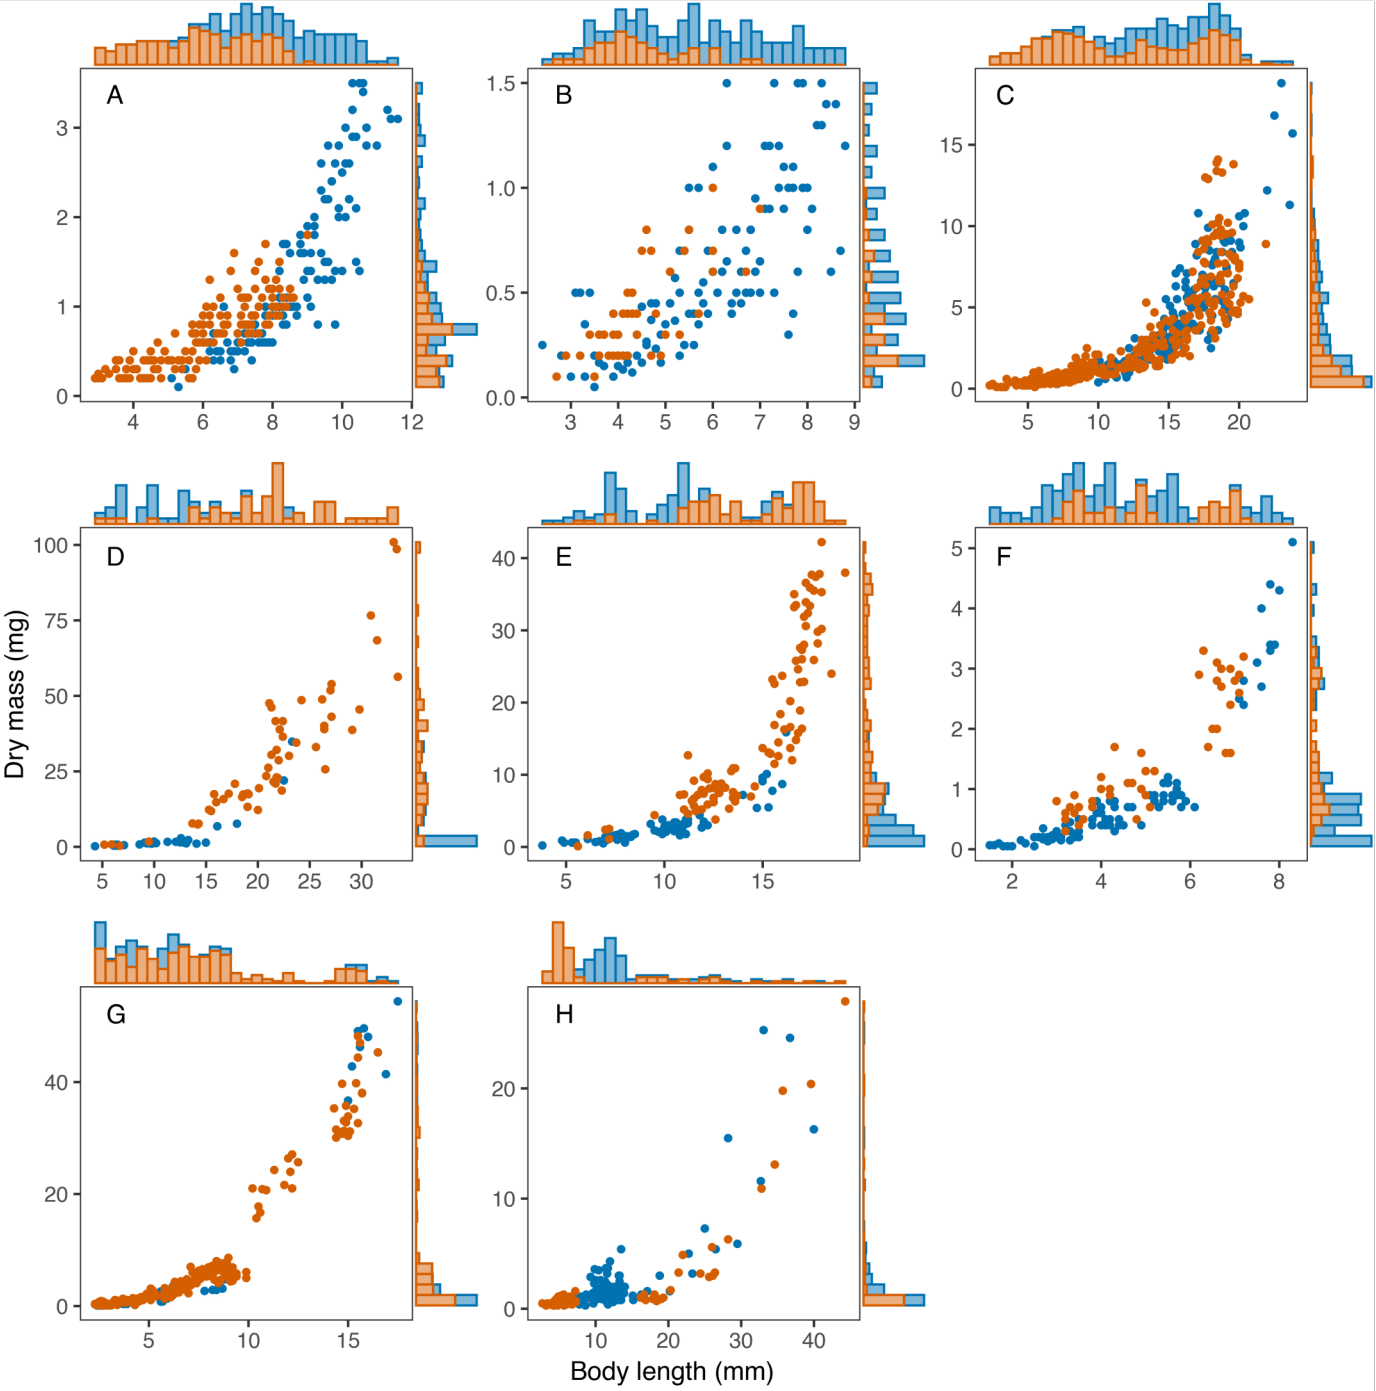

Supplement: FigS1.pdf [file FigS1.pdf]
