# Supplementary material for: Length-mass relationships of pond macroinvertebrates do not hold between Southern and Northern Europe
Source: PeerJ. 2024 Dec 16;12:e18576. doi: 10.7717/peerj.18576 (PMC11657199; doi:10.7717/peerj.18576)
Supplement: Supplemental Information 3 — The raw data all individuals of aquatic macroinvertebrates from Portugal and Sweden which were sampled, determined and processed in the laboratory for measurements of body length (mm) and mass (mg). These individuals were used for estimating length-mass relationships, comparisons and statistical analysis in the paper. [file peerj-12-18576-s003.xlsx]

## Sheet: Sheet1
FAMILY/GENUS	COUNTRY	LENGTH (mm)	MASS (mg)	SITE
Cleon	Sweden	6.9	0.3	Sweden2
Cleon	Sweden	6.8	0.4	Sweden2
Cleon	Sweden	7.3	0.7	Sweden2
Cleon	Sweden	6.8	0.5	Sweden2
Cleon	Sweden	7.3	0.8	Sweden2
Cleon	Sweden	7.5	0.7	Sweden2
Cleon	Sweden	9.1	1.4	Sweden2
Cleon	Sweden	9.8	2.6	Sweden2
Cleon	Sweden	10.7	3	Sweden2
Cleon	Sweden	9.4	2.6	Sweden2
Cleon	Sweden	9	1.1	Sweden2
Cleon	Sweden	8.3	0.9	Sweden2
Cleon	Sweden	9.8	1.4	Sweden2
Cleon	Sweden	10.2	2.2	Sweden2
Cleon	Sweden	9.8	0.8	Sweden2
Cleon	Sweden	8	0.9	Sweden2
Cleon	Sweden	8.4	1.1	Sweden2
Cleon	Sweden	8.6	1.1	Sweden2
Cleon	Sweden	7.1	0.8	Sweden2
Cleon	Sweden	7.8	0.9	Sweden2
Cleon	Sweden	9.4	1.6	Sweden2
Cleon	Sweden	8.6	1	Sweden2
Cleon	Sweden	8.2	1	Sweden2
Cleon	Sweden	8.3	1.7	Sweden2
Cleon	Sweden	8.5	1.2	Sweden2
Cleon	Sweden	9.6	2.2	Sweden2
Cleon	Sweden	10	1.4	Sweden2
Cleon	Sweden	8.6	1.1	Sweden2
Cleon	Sweden	6.6	1	Sweden2
Cleon	Sweden	8.3	0.8	Sweden2
Cleon	Sweden	8.7	1	Sweden2
Cleon	Sweden	9.7	2.4	Sweden2
Cleon	Sweden	9.9	2.1	Sweden2
Cleon	Sweden	10.1	3	Sweden2
Cleon	Sweden	10	1.4	Sweden2
Cleon	Sweden	9.7	1.3	Sweden2
Cleon	Sweden	10.1	2	Sweden2
Cleon	Sweden	10	2.5	Sweden2
Cleon	Sweden	8.7	0.9	Sweden2
Cleon	Sweden	8.2	1.1	Sweden2
Cleon	Sweden	9.5	1.3	Sweden2
Cleon	Sweden	9.1	1	Sweden2
Cleon	Sweden	7.7	0.7	Sweden2
Cleon	Sweden	9.5	2.2	Sweden2
Cleon	Sweden	10.4	1.5	Sweden2
Cleon	Sweden	9.3	1.3	Sweden2
Cleon	Sweden	9.1	1.6	Sweden2
Cleon	Sweden	8.4	0.8	Sweden2
Cleon	Sweden	9.5	1.5	Sweden2
Cleon	Sweden	7.4	0.4	Sweden3
Cleon	Sweden	8.2	1.4	Sweden3
Cleon	Sweden	7.2	1	Sweden3
Cleon	Sweden	9.6	2.8	Sweden3
Cleon	Sweden	10.3	2.9	Sweden3
Cleon	Sweden	9.3	0.8	Sweden3
Cleon	Sweden	8	0.6	Sweden3
Cleon	Sweden	8.9	1.3	Sweden3
Cleon	Sweden	8.5	1.6	Sweden3
Cleon	Sweden	10.6	3.5	Sweden3
Cleon	Sweden	11.6	3.1	Sweden3
Cleon	Sweden	10.6	3.4	Sweden3
Cleon	Sweden	10.3	3.5	Sweden3
Cleon	Sweden	10.3	3.2	Sweden3
Cleon	Sweden	11.3	3.2	Sweden3
Cleon	Sweden	10.5	3.5	Sweden3
Cleon	Sweden	10.2	2.6	Sweden3
Cleon	Sweden	10.4	2.9	Sweden3
Cleon	Sweden	9	1.9	Sweden3
Cleon	Sweden	10.5	1.4	Sweden3
Cleon	Sweden	10.1	2.6	Sweden3
Cleon	Sweden	9.2	2	Sweden3
Cleon	Sweden	8.8	1.6	Sweden3
Cleon	Sweden	10.2	2.2	Sweden3
Cleon	Sweden	8.8	1.8	Sweden3
Cleon	Sweden	8	1	Sweden3
Cleon	Sweden	8.8	1.7	Sweden3
Cleon	Sweden	8.9	1.6	Sweden3
Cleon	Sweden	9.2	1.8	Sweden3
Cleon	Sweden	9.2	1.9	Sweden3
Cleon	Sweden	9.6	1.5	Sweden3
Cleon	Sweden	10.4	2.1	Sweden3
Cleon	Sweden	9.9	2.8	Sweden3
Cleon	Sweden	7.9	0.6	Sweden3
Cleon	Sweden	8.1	0.9	Sweden3
Cleon	Sweden	7.2	0.7	Sweden3
Cleon	Sweden	7	0.5	Sweden4
Cleon	Sweden	9.3	1.3	Sweden4
Cleon	Sweden	9.4	2.3	Sweden4
Cleon	Sweden	8.7	0.9	Sweden4
Cleon	Sweden	9.7	2.4	Sweden4
Cleon	Sweden	9	1.4	Sweden4
Cleon	Sweden	9.9	2	Sweden4
Cleon	Sweden	7.6	0.7	Sweden4
Cleon	Sweden	8.4	1.7	Sweden4
Cleon	Sweden	7.7	0.6	Sweden4
Cleon	Sweden	7.8	1	Sweden4
Cleon	Sweden	7.2	0.5	Sweden4
Cleon	Sweden	7.6	0.6	Sweden4
Cleon	Sweden	7.8	0.6	Sweden4
Cleon	Sweden	7.9	1.2	Sweden4
Cleon	Sweden	6.5	0.4	Sweden4
Cleon	Sweden	8.5	1	Sweden4
Cleon	Sweden	7.3	0.6	Sweden4
Cleon	Sweden	6.4	0.5	Sweden5
Cleon	Sweden	5.3	0.1	Sweden5
Cleon	Sweden	5.1	0.2	Sweden5
Cleon	Sweden	6.2	0.5	Sweden5
Cleon	Sweden	6.3	0.7	Sweden5
Cleon	Sweden	5.7	0.2	Sweden5
Cleon	Sweden	5.5	0.3	Sweden5
Cleon	Sweden	6.3	0.4	Sweden5
Cleon	Sweden	7	0.7	Sweden5
Cleon	Sweden	6.7	0.6	Sweden5
Cleon	Sweden	6.7	0.6	Sweden5
Cleon	Sweden	6.2	0.6	Sweden5
Cleon	Sweden	6.5	0.5	Sweden5
Cleon	Sweden	7.5	0.8	Sweden5
Cleon	Sweden	7.5	0.7	Sweden5
Cleon	Sweden	7.1	0.6	Sweden5
Cleon	Sweden	6.5	0.7	Sweden5
Cleon	Sweden	7	0.6	Sweden5
Cleon	Sweden	7.6	0.7	Sweden5
Cleon	Sweden	6.9	0.5	Sweden5
Cleon	Sweden	7.4	0.6	Sweden5
Cleon	Sweden	7.4	0.9	Sweden5
Cleon	Sweden	10.7	2.8	Sweden5
Cleon	Sweden	11.4	3.1	Sweden5
Cleon	Sweden	10.7	3	Sweden5
Cleon	Sweden	11	2.8	Sweden5
Cleon	Portugal	2.9	0.2	Portugal3
Cleon	Portugal	3	0.25	Portugal3
Cleon	Portugal	3.1	0.2	Portugal3
Cleon	Portugal	3.3	0.25	Portugal3
Cleon	Portugal	3.5	0.3	Portugal3
Cleon	Portugal	3.5	0.4	Portugal3
Cleon	Portugal	3.5	0.4	Portugal3
Cleon	Portugal	3.7	0.2	Portugal3
Cleon	Portugal	3.8	0.3	Portugal3
Cleon	Portugal	3.9	0.2	Portugal3
Cleon	Portugal	4	0.5	Portugal3
Cleon	Portugal	4	0.3	Portugal3
Cleon	Portugal	4.1	0.3	Portugal3
Cleon	Portugal	4.2	0.2	Portugal3
Cleon	Portugal	4.2	0.2	Portugal3
Cleon	Portugal	4.3	0.4	Portugal3
Cleon	Portugal	4.3	0.2	Portugal3
Cleon	Portugal	4.3	0.2	Portugal3
Cleon	Portugal	4.4	0.4	Portugal3
Cleon	Portugal	4.4	0.2	Portugal3
Cleon	Portugal	4.5	0.4	Portugal3
Cleon	Portugal	4.5	0.5	Portugal3
Cleon	Portugal	4.5	0.2	Portugal3
Cleon	Portugal	4.6	0.4	Portugal3
Cleon	Portugal	4.6	0.3	Portugal3
Cleon	Portugal	4.7	0.6	Portugal3
Cleon	Portugal	4.7	0.3	Portugal3
Cleon	Portugal	4.8	0.4	Portugal3
Cleon	Portugal	4.8	0.2	Portugal3
Cleon	Portugal	4.9	0.5	Portugal3
Cleon	Portugal	4.9	0.5	Portugal3
Cleon	Portugal	4.9	0.5	Portugal3
Cleon	Portugal	5	0.4	Portugal3
Cleon	Portugal	5	0.4	Portugal3
Cleon	Portugal	5.1	0.4	Portugal3
Cleon	Portugal	5.1	0.4	Portugal3
Cleon	Portugal	5.2	0.7	Portugal3
Cleon	Portugal	5.2	0.3	Portugal3
Cleon	Portugal	5.3	0.4	Portugal3
Cleon	Portugal	5.4	0.4	Portugal3
Cleon	Portugal	5.4	0.4	Portugal3
Cleon	Portugal	5.4	0.3	Portugal3
Cleon	Portugal	5.5	0.5	Portugal3
Cleon	Portugal	5.6	0.2	Portugal3
Cleon	Portugal	5.6	0.4	Portugal3
Cleon	Portugal	5.6	0.4	Portugal3
Cleon	Portugal	5.7	0.5	Portugal3
Cleon	Portugal	5.7	0.2	Portugal3
Cleon	Portugal	5.7	0.7	Portugal3
Cleon	Portugal	5.7	0.8	Portugal3
Cleon	Portugal	5.8	0.6	Portugal3
Cleon	Portugal	5.8	0.7	Portugal3
Cleon	Portugal	5.8	0.3	Portugal3
Cleon	Portugal	5.9	0.4	Portugal3
Cleon	Portugal	5.9	0.8	Portugal3
Cleon	Portugal	5.9	0.6	Portugal3
Cleon	Portugal	5.9	0.4	Portugal3
Cleon	Portugal	6	0.6	Portugal3
Cleon	Portugal	6	0.9	Portugal3
Cleon	Portugal	6	0.8	Portugal3
Cleon	Portugal	6	0.7	Portugal3
Cleon	Portugal	6.1	0.4	Portugal3
Cleon	Portugal	6.1	0.6	Portugal3
Cleon	Portugal	6.1	1	Portugal3
Cleon	Portugal	6.2	0.9	Portugal3
Cleon	Portugal	6.2	0.8	Portugal3
Cleon	Portugal	6.2	1.3	Portugal3
Cleon	Portugal	6.3	1	Portugal3
Cleon	Portugal	6.3	0.6	Portugal3
Cleon	Portugal	6.3	0.6	Portugal3
Cleon	Portugal	6.4	0.7	Portugal3
Cleon	Portugal	6.4	0.7	Portugal3
Cleon	Portugal	6.4	0.7	Portugal3
Cleon	Portugal	6.5	1.1	Portugal3
Cleon	Portugal	6.5	0.7	Portugal3
Cleon	Portugal	6.5	0.9	Portugal3
Cleon	Portugal	6.6	0.7	Portugal3
Cleon	Portugal	6.6	0.8	Portugal3
Cleon	Portugal	6.7	0.8	Portugal3
Cleon	Portugal	6.7	0.9	Portugal3
Cleon	Portugal	6.8	1.4	Portugal3
Cleon	Portugal	6.9	1.6	Portugal3
Cleon	Portugal	7	0.7	Portugal3
Cleon	Portugal	7	1.2	Portugal3
Cleon	Portugal	7.1	1.1	Portugal3
Cleon	Portugal	7.1	0.8	Portugal3
Cleon	Portugal	7.1	0.9	Portugal3
Cleon	Portugal	7.1	0.6	Portugal3
Cleon	Portugal	7.1	0.9	Portugal3
Cleon	Portugal	7.2	1.1	Portugal3
Cleon	Portugal	7.2	0.8	Portugal3
Cleon	Portugal	7.2	1	Portugal3
Cleon	Portugal	7.3	0.8	Portugal3
Cleon	Portugal	7.3	1.1	Portugal3
Cleon	Portugal	7.3	0.7	Portugal3
Cleon	Portugal	7.4	0.7	Portugal3
Cleon	Portugal	7.4	0.9	Portugal3
Cleon	Portugal	7.4	0.8	Portugal3
Cleon	Portugal	7.5	1.4	Portugal3
Cleon	Portugal	7.5	1.2	Portugal3
Cleon	Portugal	7.5	0.9	Portugal3
Cleon	Portugal	7.6	1	Portugal3
Cleon	Portugal	7.7	1.1	Portugal3
Cleon	Portugal	3	0.2	Portugal4
Cleon	Portugal	3.2	0.3	Portugal4
Cleon	Portugal	3.6	0.2	Portugal4
Cleon	Portugal	3.6	0.4	Portugal4
Cleon	Portugal	3.8	0.2	Portugal4
Cleon	Portugal	3.8	0.3	Portugal4
Cleon	Portugal	3.9	0.4	Portugal4
Cleon	Portugal	4.1	0.3	Portugal4
Cleon	Portugal	7.6	1.5	Portugal4
Cleon	Portugal	7.6	0.7	Portugal4
Cleon	Portugal	7.8	1.3	Portugal4
Cleon	Portugal	7.8	1.7	Portugal4
Cleon	Portugal	7.8	0.8	Portugal4
Cleon	Portugal	7.9	0.8	Portugal4
Cleon	Portugal	7.9	1.2	Portugal4
Cleon	Portugal	7.9	0.9	Portugal4
Cleon	Portugal	8	1.2	Portugal4
Cleon	Portugal	8	1	Portugal4
Cleon	Portugal	8	1.1	Portugal4
Cleon	Portugal	8.1	0.9	Portugal4
Cleon	Portugal	8.1	1	Portugal4
Cleon	Portugal	8.1	1.3	Portugal4
Cleon	Portugal	8.2	1.2	Portugal4
Cleon	Portugal	8.2	1.5	Portugal4
Cleon	Portugal	8.2	0.9	Portugal4
Cleon	Portugal	8.3	1	Portugal4
Cleon	Portugal	8.3	1.1	Portugal4
Cleon	Portugal	8.4	1	Portugal4
Cleon	Portugal	8.5	1.1	Portugal4
Cleon	Portugal	8.5	1.2	Portugal4
Cleon	Portugal	8.6	1.1	Portugal4
Cleon	Portugal	9	1.8	Portugal4
Caenis	Sweden	5.6	0.4	Sweden1
Caenis	Sweden	5	0.35	Sweden1
Caenis	Sweden	4	0.15	Sweden1
Caenis	Sweden	4.4	0.3	Sweden1
Caenis	Sweden	5.9	0.4	Sweden1
Caenis	Sweden	6	1.1	Sweden1
Caenis	Sweden	3.3	0.1	Sweden4
Caenis	Sweden	7.4	1	Sweden4
Caenis	Sweden	7.8	1.5	Sweden4
Caenis	Sweden	7.5	0.9	Sweden4
Caenis	Sweden	8.6	1.4	Sweden4
Caenis	Sweden	6.4	0.45	Sweden4
Caenis	Sweden	7.1	0.9	Sweden4
Caenis	Sweden	7.2	0.9	Sweden4
Caenis	Sweden	6.5	0.5	Sweden4
Caenis	Sweden	6.5	0.8	Sweden4
Caenis	Sweden	7.2	1.2	Sweden4
Caenis	Sweden	7.6	1	Sweden4
Caenis	Sweden	7	0.65	Sweden4
Caenis	Sweden	7.1	1.2	Sweden4
Caenis	Sweden	8.2	1.3	Sweden4
Caenis	Sweden	8.4	1.4	Sweden4
Caenis	Sweden	8.4	1.4	Sweden4
Caenis	Sweden	8.5	0.6	Sweden4
Caenis	Sweden	7.9	1.5	Sweden4
Caenis	Sweden	7.9	1	Sweden4
Caenis	Sweden	8	0.8	Sweden4
Caenis	Sweden	8.7	0.7	Sweden4
Caenis	Sweden	7.7	1	Sweden4
Caenis	Sweden	7.6	0.3	Sweden4
Caenis	Sweden	7.8	0.6	Sweden4
Caenis	Sweden	8.8	1.2	Sweden4
Caenis	Sweden	8.1	0.9	Sweden4
Caenis	Sweden	8.3	1.3	Sweden4
Caenis	Sweden	8	1	Sweden4
Caenis	Sweden	7.3	0.5	Sweden4
Caenis	Sweden	7	0.5	Sweden4
Caenis	Sweden	6.6	0.45	Sweden4
Caenis	Sweden	6.9	0.95	Sweden4
Caenis	Sweden	6.6	0.6	Sweden4
Caenis	Sweden	7.5	1.1	Sweden4
Caenis	Sweden	6.7	0.7	Sweden4
Caenis	Sweden	6.2	0.6	Sweden4
Caenis	Sweden	6.3	0.65	Sweden4
Caenis	Sweden	6.4	0.4	Sweden4
Caenis	Sweden	5.9	0.7	Sweden4
Caenis	Sweden	5.8	0.45	Sweden4
Caenis	Sweden	7.4	1.2	Sweden4
Caenis	Sweden	7.3	1.5	Sweden4
Caenis	Sweden	7.7	1.1	Sweden4
Caenis	Sweden	6.1	0.5	Sweden4
Caenis	Sweden	6.1	0.5	Sweden4
Caenis	Sweden	6.2	0.6	Sweden4
Caenis	Sweden	6.2	0.8	Sweden4
Caenis	Sweden	6.8	0.8	Sweden4
Caenis	Sweden	6.8	0.8	Sweden4
Caenis	Sweden	6.9	0.6	Sweden4
Caenis	Sweden	6.9	0.6	Sweden4
Caenis	Sweden	6	0.6	Sweden4
Caenis	Sweden	6	0.6	Sweden4
Caenis	Sweden	5.5	0.4	Sweden4
Caenis	Sweden	5.6	0.25	Sweden4
Caenis	Sweden	5.1	0.45	Sweden4
Caenis	Sweden	5.2	0.366667	Sweden4
Caenis	Sweden	5.4	0.25	Sweden4
Caenis	Sweden	4.8	0.45	Sweden4
Caenis	Sweden	6.7	0.5	Sweden4
Caenis	Sweden	7.7	0.4	Sweden4
Caenis	Sweden	4.1	0.133333	Sweden4
Caenis	Sweden	3.9	0.1	Sweden4
Caenis	Sweden	4.2	0.166667	Sweden4
Caenis	Sweden	4.3	0.12	Sweden4
Caenis	Sweden	4.4	0.2	Sweden4
Caenis	Sweden	3	0.1	Sweden4
Caenis	Sweden	4.5	0.166667	Sweden4
Caenis	Sweden	4	0.2	Sweden4
Caenis	Sweden	4.6	0.266667	Sweden4
Caenis	Sweden	3.5	0.05	Sweden4
Caenis	Sweden	3.6	0.166667	Sweden5
Caenis	Sweden	3.5	0.2	Sweden5
Caenis	Sweden	3.4	0.5	Sweden5
Caenis	Sweden	4.5	0.433333	Sweden5
Caenis	Sweden	3.3	0.35	Sweden5
Caenis	Sweden	3.7	0.15	Sweden5
Caenis	Sweden	2.8	0.2	Sweden5
Caenis	Sweden	4	0.3	Sweden5
Caenis	Sweden	3.9	0.4	Sweden5
Caenis	Sweden	3.1	0.5	Sweden5
Caenis	Sweden	5.1	0.45	Sweden5
Caenis	Sweden	4.2	0.2	Sweden5
Caenis	Sweden	2.4	0.25	Sweden5
Caenis	Sweden	4.9	0.166667	Sweden5
Caenis	Sweden	8.3	1.5	Sweden5
Caenis	Sweden	5.5	1	Sweden5
Caenis	Sweden	5.5	0.8	Sweden5
Caenis	Sweden	6.3	1.2	Sweden5
Caenis	Sweden	6.3	1.5	Sweden5
Caenis	Sweden	5.3	0.7	Sweden5
Caenis	Sweden	5.3	0.2	Sweden5
Caenis	Sweden	5.2	0.57	Sweden5
Caenis	Sweden	4.9	0.3	Sweden5
Caenis	Sweden	4.8	0.233333	Sweden5
Caenis	Sweden	3.2	0.5	Sweden5
Caenis	Sweden	5.7	0.5	Sweden5
Caenis	Sweden	5.7	1	Sweden5
Caenis	Sweden	4.7	0.37	Sweden5
Caenis	Sweden	5.4	0.7	Sweden5
Caenis	Sweden	5.4	0.7	Sweden5
Caenis	Sweden	5.8	0.55	Sweden5
Caenis	Sweden	4.7	0.45	Sweden5
Caenis	Sweden	5.3	0.5	Sweden5
Caenis	Sweden	6.8	0.5	Sweden5
Caenis	Sweden	5.7	0.35	Sweden5
Caenis	Sweden	4.6	0.25	Sweden5
Caenis	Portugal	3.4	0.3	Portugal3
Caenis	Portugal	3.6	0.2	Portugal3
Caenis	Portugal	3.6	0.3	Portugal3
Caenis	Portugal	3.7	0.3	Portugal3
Caenis	Portugal	3.8	0.2	Portugal3
Caenis	Portugal	3.9	0.3	Portugal3
Caenis	Portugal	3.9	0.4	Portugal3
Caenis	Portugal	4	0.2	Portugal3
Caenis	Portugal	4	0.2	Portugal3
Caenis	Portugal	4.1	0.2	Portugal3
Caenis	Portugal	4.1	0.4	Portugal3
Caenis	Portugal	4.2	0.4	Portugal3
Caenis	Portugal	4.2	0.5	Portugal3
Caenis	Portugal	4.3	0.4	Portugal3
Caenis	Portugal	4.4	0.3	Portugal3
Caenis	Portugal	4.7	0.2	Portugal3
Caenis	Portugal	4.8	0.4	Portugal3
Caenis	Portugal	5.3	0.3	Portugal3
Caenis	Portugal	2.7	0.1	Portugal3
Caenis	Portugal	3.5	0.1	Portuagal4
Caenis	Portugal	3.9	0.2	Portuagal4
Caenis	Portugal	4	0.3	Portuagal4
Caenis	Portugal	4.1	0.2	Portuagal4
Caenis	Portugal	4.2	0.2	Portuagal4
Caenis	Portugal	4.4	0.4	Portuagal4
Caenis	Portugal	4.7	0.7	Portuagal4
Caenis	Portugal	5	0.3	Portuagal4
Caenis	Portugal	5.7	0.4	Portuagal4
Caenis	Portugal	6	0.6	Portuagal4
Caenis	Portugal	6.7	0.6	Portuagal4
Caenis	Portugal	7	0.9	Portuagal5
Caenis	Portugal	2.9	0.2	Portuagal6
Caenis	Portugal	3.5	0.1	Portuagal6
Caenis	Portugal	3.6	0.2	Portuagal6
Caenis	Portugal	4.3	0.5	Portuagal6
Caenis	Portugal	4.5	0.7	Portuagal6
Caenis	Portugal	4.6	0.8	Portuagal6
Caenis	Portugal	4.9	0.2	Portuagal6
Caenis	Portugal	5.1	0.6	Portuagal6
Caenis	Portugal	5.4	0.7	Portuagal6
Caenis	Portugal	5.5	0.8	Portuagal6
Caenis	Portugal	5.7	0.4	Portuagal6
Caenis	Portugal	3.2	0.2	Portuagal7
Caenis	Portugal	6	1	Portuagal8
Caenis	Portugal	6	0.7	Portuagal8
Coenagrionidae	Sweden	11.9	1	Sweden1
Coenagrionidae	Sweden	11.2	0.8	Sweden1
Coenagrionidae	Sweden	8.5	0.7	Sweden1
Coenagrionidae	Sweden	10.8	1.1	Sweden1
Coenagrionidae	Sweden	10.5	0.6	Sweden1
Coenagrionidae	Sweden	12.6	1.5	Sweden1
Coenagrionidae	Sweden	11.2	1	Sweden1
Coenagrionidae	Sweden	10.9	1.1	Sweden1
Coenagrionidae	Sweden	10.2	1.3	Sweden1
Coenagrionidae	Sweden	10.1	1.5	Sweden1
Coenagrionidae	Sweden	11.9	1.7	Sweden1
Coenagrionidae	Sweden	13.3	1.4	Sweden1
Coenagrionidae	Sweden	12.4	1.3	Sweden1
Coenagrionidae	Sweden	11.2	1.2	Sweden1
Coenagrionidae	Sweden	12	1.4	Sweden1
Coenagrionidae	Sweden	8.6	0.6	Sweden1
Coenagrionidae	Sweden	10.4	1.3	Sweden1
Coenagrionidae	Sweden	8.9	0.8	Sweden1
Coenagrionidae	Sweden	11.3	0.7	Sweden1
Coenagrionidae	Sweden	14.2	1.4	Sweden1
Coenagrionidae	Sweden	14	1.7	Sweden1
Coenagrionidae	Sweden	10.9	1	Sweden1
Coenagrionidae	Sweden	12.3	1.5	Sweden1
Coenagrionidae	Sweden	14.7	4.3	Sweden1
Coenagrionidae	Sweden	14.1	1.4	Sweden1
Coenagrionidae	Sweden	15	2.5	Sweden1
Coenagrionidae	Sweden	14.9	1.8	Sweden1
Coenagrionidae	Sweden	13.9	3.2	Sweden1
Coenagrionidae	Sweden	14.2	1.7	Sweden1
Coenagrionidae	Sweden	14.2	1.5	Sweden1
Coenagrionidae	Sweden	13.5	2.9	Sweden1
Coenagrionidae	Sweden	13.6	2.4	Sweden1
Coenagrionidae	Sweden	15.6	3.4	Sweden1
Coenagrionidae	Sweden	11.8	1.6	Sweden1
Coenagrionidae	Sweden	13.7	1.8	Sweden1
Coenagrionidae	Sweden	12.8	2	Sweden1
Coenagrionidae	Sweden	14.7	2.1	Sweden1
Coenagrionidae	Sweden	12.6	3.1	Sweden1
Coenagrionidae	Sweden	14.1	3	Sweden1
Coenagrionidae	Sweden	13.6	2.2	Sweden1
Coenagrionidae	Sweden	14.9	2.1	Sweden1
Coenagrionidae	Sweden	15.9	3.5	Sweden1
Coenagrionidae	Sweden	14	2.9	Sweden1
Coenagrionidae	Sweden	15.2	2.7	Sweden1
Coenagrionidae	Sweden	14.5	2.5	Sweden1
Coenagrionidae	Sweden	16.4	5.8	Sweden1
Coenagrionidae	Sweden	17.5	6.9	Sweden1
Coenagrionidae	Sweden	16.5	5.9	Sweden1
Coenagrionidae	Sweden	17.8	3	Sweden1
Coenagrionidae	Sweden	16.6	5	Sweden1
Coenagrionidae	Sweden	16	4.6	Sweden1
Coenagrionidae	Sweden	14.3	2.3	Sweden1
Coenagrionidae	Sweden	14.6	3.6	Sweden1
Coenagrionidae	Sweden	15.8	3.8	Sweden1
Coenagrionidae	Sweden	19.4	5.8	Sweden1
Coenagrionidae	Sweden	17.4	7	Sweden1
Coenagrionidae	Sweden	18.3	5.5	Sweden1
Coenagrionidae	Sweden	16	3.4	Sweden1
Coenagrionidae	Sweden	18	3.4	Sweden1
Coenagrionidae	Sweden	17	5.4	Sweden1
Coenagrionidae	Sweden	16.7	4	Sweden1
Coenagrionidae	Sweden	17.5	5	Sweden1
Coenagrionidae	Sweden	15.5	6.3	Sweden1
Coenagrionidae	Sweden	18	4.5	Sweden1
Coenagrionidae	Sweden	17.1	5	Sweden1
Coenagrionidae	Sweden	19.3	4.8	Sweden1
Coenagrionidae	Sweden	19	6.1	Sweden1
Coenagrionidae	Sweden	18.1	4.5	Sweden1
Coenagrionidae	Sweden	19	5	Sweden1
Coenagrionidae	Sweden	23.6	11.3	Sweden1
Coenagrionidae	Sweden	22	12.2	Sweden1
Coenagrionidae	Sweden	10.6	1.2	Sweden2
Coenagrionidae	Sweden	11.9	1.6	Sweden2
Coenagrionidae	Sweden	16.2	6.2	Sweden2
Coenagrionidae	Sweden	15.4	4.4	Sweden2
Coenagrionidae	Sweden	14.8	5.5	Sweden2
Coenagrionidae	Sweden	16.2	6.6	Sweden2
Coenagrionidae	Sweden	15.6	5.5	Sweden2
Coenagrionidae	Sweden	15.5	7.1	Sweden2
Coenagrionidae	Sweden	17.5	6.3	Sweden2
Coenagrionidae	Sweden	18.3	6.5	Sweden2
Coenagrionidae	Sweden	18.4	6.6	Sweden2
Coenagrionidae	Sweden	19.1	7.4	Sweden2
Coenagrionidae	Sweden	13.2	2.2	Sweden3
Coenagrionidae	Sweden	15.1	3.1	Sweden3
Coenagrionidae	Sweden	10	1	Sweden3
Coenagrionidae	Sweden	12.5	2	Sweden3
Coenagrionidae	Sweden	12.5	1.5	Sweden3
Coenagrionidae	Sweden	8.3	0.7	Sweden3
Coenagrionidae	Sweden	17.2	3.6	Sweden3
Coenagrionidae	Sweden	18	2.5	Sweden3
Coenagrionidae	Sweden	17.6	5.8	Sweden3
Coenagrionidae	Sweden	12.5	1.5	Sweden3
Coenagrionidae	Sweden	15.1	3.2	Sweden3
Coenagrionidae	Sweden	16.3	7.1	Sweden3
Coenagrionidae	Sweden	13.7	2.7	Sweden3
Coenagrionidae	Sweden	15.7	3	Sweden3
Coenagrionidae	Sweden	16.7	5.6	Sweden3
Coenagrionidae	Sweden	17.6	5.7	Sweden3
Coenagrionidae	Sweden	18.8	8.4	Sweden3
Coenagrionidae	Sweden	16.3	5.6	Sweden3
Coenagrionidae	Sweden	16.8	5.2	Sweden3
Coenagrionidae	Sweden	18.3	8	Sweden3
Coenagrionidae	Sweden	18.1	7.6	Sweden3
Coenagrionidae	Sweden	18.9	9.1	Sweden3
Coenagrionidae	Sweden	17	3.8	Sweden3
Coenagrionidae	Sweden	19.1	7.5	Sweden3
Coenagrionidae	Sweden	19.4	9.1	Sweden3
Coenagrionidae	Sweden	19	9	Sweden3
Coenagrionidae	Sweden	6.4	0.4	Sweden4
Coenagrionidae	Sweden	8.7	0.6	Sweden4
Coenagrionidae	Sweden	10	0.4	Sweden4
Coenagrionidae	Sweden	12	0.7	Sweden4
Coenagrionidae	Sweden	12.5	2	Sweden4
Coenagrionidae	Sweden	7.1	0.3	Sweden4
Coenagrionidae	Sweden	12	1.6	Sweden4
Coenagrionidae	Sweden	13.4	1.9	Sweden4
Coenagrionidae	Sweden	15.1	3.1	Sweden4
Coenagrionidae	Sweden	13.5	1.9	Sweden4
Coenagrionidae	Sweden	15.2	2.3	Sweden4
Coenagrionidae	Sweden	14.7	2.9	Sweden4
Coenagrionidae	Sweden	14.8	3.2	Sweden4
Coenagrionidae	Sweden	15.1	5.1	Sweden4
Coenagrionidae	Sweden	15.3	3.1	Sweden4
Coenagrionidae	Sweden	16.6	5.2	Sweden4
Coenagrionidae	Sweden	17.6	6.2	Sweden4
Coenagrionidae	Sweden	17.9	6.6	Sweden4
Coenagrionidae	Sweden	17	8.2	Sweden4
Coenagrionidae	Sweden	11.4	1.5	Sweden5
Coenagrionidae	Sweden	8.1	0.6	Sweden5
Coenagrionidae	Sweden	11.5	1.4	Sweden5
Coenagrionidae	Sweden	11.4	1.3	Sweden5
Coenagrionidae	Sweden	12.9	1.8	Sweden5
Coenagrionidae	Sweden	8.5	0.7	Sweden5
Coenagrionidae	Sweden	10	1.1	Sweden5
Coenagrionidae	Sweden	10.7	1.5	Sweden5
Coenagrionidae	Sweden	13	1.9	Sweden5
Coenagrionidae	Sweden	11	1.3	Sweden5
Coenagrionidae	Sweden	14.7	3.1	Sweden5
Coenagrionidae	Sweden	11.1	1.7	Sweden5
Coenagrionidae	Sweden	12.2	1	Sweden5
Coenagrionidae	Sweden	12.4	1.8	Sweden5
Coenagrionidae	Sweden	8.2	0.7	Sweden5
Coenagrionidae	Sweden	12.2	2.5	Sweden5
Coenagrionidae	Sweden	12.1	1.2	Sweden5
Coenagrionidae	Sweden	10.1	1.7	Sweden5
Coenagrionidae	Sweden	15.5	3.9	Sweden5
Coenagrionidae	Sweden	14.9	3.9	Sweden5
Coenagrionidae	Sweden	15.7	4	Sweden5
Coenagrionidae	Sweden	14.5	3.2	Sweden5
Coenagrionidae	Sweden	14.3	3.3	Sweden5
Coenagrionidae	Sweden	12.7	1.5	Sweden5
Coenagrionidae	Sweden	14.6	2.7	Sweden5
Coenagrionidae	Sweden	16.1	2.5	Sweden5
Coenagrionidae	Sweden	18.2	6.3	Sweden5
Coenagrionidae	Sweden	16.8	6.1	Sweden5
Coenagrionidae	Sweden	16.5	3.8	Sweden5
Coenagrionidae	Sweden	16.9	8.9	Sweden5
Coenagrionidae	Sweden	17.1	10.8	Sweden5
Coenagrionidae	Sweden	16.4	5.3	Sweden5
Coenagrionidae	Sweden	17.8	9.9	Sweden5
Coenagrionidae	Sweden	15.8	7.4	Sweden5
Coenagrionidae	Sweden	15.3	4.7	Sweden5
Coenagrionidae	Sweden	19.2	4.3	Sweden5
Coenagrionidae	Sweden	17.3	5.4	Sweden5
Coenagrionidae	Sweden	18.2	7.8	Sweden5
Coenagrionidae	Sweden	19.7	8	Sweden5
Coenagrionidae	Sweden	17.4	9.1	Sweden5
Coenagrionidae	Sweden	17.9	8.5	Sweden5
Coenagrionidae	Sweden	18.5	3.6	Sweden5
Coenagrionidae	Sweden	19.5	8.4	Sweden5
Coenagrionidae	Sweden	15.9	3.9	Sweden5
Coenagrionidae	Sweden	18.4	8.4	Sweden5
Coenagrionidae	Sweden	17.3	6.6	Sweden5
Coenagrionidae	Sweden	18.6	10.5	Sweden5
Coenagrionidae	Sweden	19.6	6.5	Sweden5
Coenagrionidae	Sweden	20	10.6	Sweden5
Coenagrionidae	Sweden	18.8	5.4	Sweden5
Coenagrionidae	Sweden	18.7	6.5	Sweden5
Coenagrionidae	Sweden	20	9	Sweden5
Coenagrionidae	Sweden	18.7	6.6	Sweden5
Coenagrionidae	Sweden	20.4	10.8	Sweden5
Coenagrionidae	Sweden	20.3	10	Sweden5
Coenagrionidae	Sweden	20.1	8.7	Sweden5
Coenagrionidae	Sweden	22.5	16.8	Sweden5
Coenagrionidae	Sweden	23.8	15.7	Sweden5
Coenagrionidae	Sweden	23	18.8	Sweden5
Coenagrionidae	Portugal	2.3	0.2	Portugal3
Coenagrionidae	Portugal	2.5	0.3	Portugal3
Coenagrionidae	Portugal	2.6	0.2	Portugal3
Coenagrionidae	Portugal	2.6	0.2	Portugal3
Coenagrionidae	Portugal	2.8	0.1	Portugal3
Coenagrionidae	Portugal	3.2	0.1	Portugal3
Coenagrionidae	Portugal	3.2	0.1	Portugal3
Coenagrionidae	Portugal	3.4	0.1	Portugal3
Coenagrionidae	Portugal	3.7	0.4	Portugal3
Coenagrionidae	Portugal	4.3	0.4	Portugal3
Coenagrionidae	Portugal	4.7	0.3	Portugal3
Coenagrionidae	Portugal	5	0.4	Portugal3
Coenagrionidae	Portugal	5.1	0.2	Portugal3
Coenagrionidae	Portugal	5.4	1	Portugal3
Coenagrionidae	Portugal	5.8	1.1	Portugal3
Coenagrionidae	Portugal	5.9	0.3	Portugal3
Coenagrionidae	Portugal	6.1	0.4	Portugal3
Coenagrionidae	Portugal	6.5	0.8	Portugal3
Coenagrionidae	Portugal	6.6	0.6	Portugal3
Coenagrionidae	Portugal	6.6	0.8	Portugal3
Coenagrionidae	Portugal	7.1	1	Portugal3
Coenagrionidae	Portugal	7.2	0.8	Portugal3
Coenagrionidae	Portugal	7.2	0.7	Portugal3
Coenagrionidae	Portugal	7.2	0.7	Portugal3
Coenagrionidae	Portugal	7.3	0.6	Portugal3
Coenagrionidae	Portugal	7.7	0.8	Portugal3
Coenagrionidae	Portugal	8.1	1.4	Portugal3
Coenagrionidae	Portugal	8.2	1.4	Portugal3
Coenagrionidae	Portugal	8.4	1.9	Portugal3
Coenagrionidae	Portugal	8.5	1.5	Portugal3
Coenagrionidae	Portugal	8.5	1.5	Portugal3
Coenagrionidae	Portugal	8.9	1.6	Portugal3
Coenagrionidae	Portugal	8.9	1.3	Portugal3
Coenagrionidae	Portugal	9.1	2	Portugal3
Coenagrionidae	Portugal	9.2	0.7	Portugal3
Coenagrionidae	Portugal	9.2	2.5	Portugal3
Coenagrionidae	Portugal	9.5	1.6	Portugal3
Coenagrionidae	Portugal	9.6	1.4	Portugal3
Coenagrionidae	Portugal	9.8	2.1	Portugal3
Coenagrionidae	Portugal	9.9	1.1	Portugal3
Coenagrionidae	Portugal	10	2.1	Portugal3
Coenagrionidae	Portugal	10.3	0.9	Portugal3
Coenagrionidae	Portugal	10.9	1.9	Portugal3
Coenagrionidae	Portugal	12.7	2.4	Portugal3
Coenagrionidae	Portugal	13.1	3	Portugal3
Coenagrionidae	Portugal	13.1	2.5	Portugal3
Coenagrionidae	Portugal	13.3	1.4	Portugal3
Coenagrionidae	Portugal	13.4	3	Portugal3
Coenagrionidae	Portugal	13.9	3.3	Portugal3
Coenagrionidae	Portugal	14	4.7	Portugal3
Coenagrionidae	Portugal	16.7	7.2	Portugal3
Coenagrionidae	Portugal	16.8	5.6	Portugal3
Coenagrionidae	Portugal	19.6	13.8	Portugal3
Coenagrionidae	Portugal	3.1	0.1	Portugal4
Coenagrionidae	Portugal	4.2	0.2	Portugal4
Coenagrionidae	Portugal	4.8	0.2	Portugal4
Coenagrionidae	Portugal	5.2	0.6	Portugal4
Coenagrionidae	Portugal	5.6	0.4	Portugal4
Coenagrionidae	Portugal	6	0.3	Portugal4
Coenagrionidae	Portugal	6.8	0.4	Portugal4
Coenagrionidae	Portugal	7.4	0.4	Portugal4
Coenagrionidae	Portugal	7.9	0.6	Portugal4
Coenagrionidae	Portugal	8	0.4	Portugal4
Coenagrionidae	Portugal	8	0.6	Portugal4
Coenagrionidae	Portugal	8.5	0.6	Portugal4
Coenagrionidae	Portugal	8.7	0.6	Portugal4
Coenagrionidae	Portugal	8.9	0.8	Portugal4
Coenagrionidae	Portugal	9.1	0.9	Portugal4
Coenagrionidae	Portugal	9.4	0.8	Portugal4
Coenagrionidae	Portugal	9.7	1.6	Portugal4
Coenagrionidae	Portugal	9.8	1.2	Portugal4
Coenagrionidae	Portugal	10	1.2	Portugal4
Coenagrionidae	Portugal	10.4	0.8	Portugal4
Coenagrionidae	Portugal	10.6	1	Portugal4
Coenagrionidae	Portugal	10.6	0.8	Portugal4
Coenagrionidae	Portugal	10.9	1.5	Portugal4
Coenagrionidae	Portugal	11	0.9	Portugal4
Coenagrionidae	Portugal	11.4	1.3	Portugal4
Coenagrionidae	Portugal	11.6	2.3	Portugal4
Coenagrionidae	Portugal	11.8	1.2	Portugal4
Coenagrionidae	Portugal	11.9	1.5	Portugal4
Coenagrionidae	Portugal	12	1.3	Portugal4
Coenagrionidae	Portugal	12.1	1.6	Portugal4
Coenagrionidae	Portugal	12.2	1.9	Portugal4
Coenagrionidae	Portugal	12.4	1.3	Portugal4
Coenagrionidae	Portugal	12.5	1.9	Portugal4
Coenagrionidae	Portugal	12.6	1.7	Portugal4
Coenagrionidae	Portugal	12.9	1.2	Portugal4
Coenagrionidae	Portugal	12.9	2.2	Portugal4
Coenagrionidae	Portugal	12.9	1.6	Portugal4
Coenagrionidae	Portugal	13	2.4	Portugal4
Coenagrionidae	Portugal	13	2.6	Portugal4
Coenagrionidae	Portugal	13.1	2.5	Portugal4
Coenagrionidae	Portugal	13.2	2.7	Portugal4
Coenagrionidae	Portugal	13.4	2.2	Portugal4
Coenagrionidae	Portugal	13.5	2.3	Portugal4
Coenagrionidae	Portugal	13.5	1.9	Portugal4
Coenagrionidae	Portugal	13.8	1.9	Portugal4
Coenagrionidae	Portugal	13.9	2.5	Portugal4
Coenagrionidae	Portugal	13.9	3.1	Portugal4
Coenagrionidae	Portugal	14	1.7	Portugal4
Coenagrionidae	Portugal	14.1	1.4	Portugal4
Coenagrionidae	Portugal	14.2	2.8	Portugal4
Coenagrionidae	Portugal	14.3	1.7	Portugal4
Coenagrionidae	Portugal	14.3	1.4	Portugal4
Coenagrionidae	Portugal	14.4	3.9	Portugal4
Coenagrionidae	Portugal	14.5	3.4	Portugal4
Coenagrionidae	Portugal	14.5	2.6	Portugal4
Coenagrionidae	Portugal	14.7	2.6	Portugal4
Coenagrionidae	Portugal	14.8	4.2	Portugal4
Coenagrionidae	Portugal	15.1	4.1	Portugal4
Coenagrionidae	Portugal	15.2	1.9	Portugal4
Coenagrionidae	Portugal	15.2	1.8	Portugal4
Coenagrionidae	Portugal	15.3	4.3	Portugal4
Coenagrionidae	Portugal	15.3	3	Portugal4
Coenagrionidae	Portugal	15.3	3.6	Portugal4
Coenagrionidae	Portugal	15.6	3.4	Portugal4
Coenagrionidae	Portugal	16	2.2	Portugal4
Coenagrionidae	Portugal	16.1	4.3	Portugal4
Coenagrionidae	Portugal	16.1	3.4	Portugal4
Coenagrionidae	Portugal	16.2	4.2	Portugal4
Coenagrionidae	Portugal	16.3	3.2	Portugal4
Coenagrionidae	Portugal	16.3	3	Portugal4
Coenagrionidae	Portugal	16.4	5.4	Portugal4
Coenagrionidae	Portugal	16.5	2	Portugal4
Coenagrionidae	Portugal	16.9	3.6	Portugal4
Coenagrionidae	Portugal	16.9	3.6	Portugal4
Coenagrionidae	Portugal	17	3.6	Portugal4
Coenagrionidae	Portugal	17.1	8.4	Portugal4
Coenagrionidae	Portugal	17.2	4.5	Portugal4
Coenagrionidae	Portugal	17.3	3.9	Portugal4
Coenagrionidae	Portugal	17.4	6.8	Portugal4
Coenagrionidae	Portugal	17.5	8.6	Portugal4
Coenagrionidae	Portugal	17.5	6.8	Portugal4
Coenagrionidae	Portugal	17.5	7.8	Portugal4
Coenagrionidae	Portugal	17.6	6.4	Portugal4
Coenagrionidae	Portugal	17.6	7.7	Portugal4
Coenagrionidae	Portugal	17.7	5.7	Portugal4
Coenagrionidae	Portugal	17.8	9	Portugal4
Coenagrionidae	Portugal	18	4.6	Portugal4
Coenagrionidae	Portugal	18	6.9	Portugal4
Coenagrionidae	Portugal	18	4.2	Portugal4
Coenagrionidae	Portugal	18.1	10.1	Portugal4
Coenagrionidae	Portugal	18.5	7.7	Portugal4
Coenagrionidae	Portugal	18.5	10.2	Portugal4
Coenagrionidae	Portugal	18.6	6.8	Portugal4
Coenagrionidae	Portugal	18.7	9.8	Portugal4
Coenagrionidae	Portugal	18.8	4.7	Portugal4
Coenagrionidae	Portugal	18.9	9.5	Portugal4
Coenagrionidae	Portugal	19.1	5.4	Portugal4
Coenagrionidae	Portugal	19.2	10.2	Portugal4
Coenagrionidae	Portugal	19.3	5.2	Portugal4
Coenagrionidae	Portugal	19.5	4.7	Portugal4
Coenagrionidae	Portugal	19.5	9.6	Portugal4
Coenagrionidae	Portugal	3.5	0.6	Portugal5
Coenagrionidae	Portugal	4.1	0.5	Portugal5
Coenagrionidae	Portugal	4.4	0.3	Portugal5
Coenagrionidae	Portugal	4.4	0.4	Portugal5
Coenagrionidae	Portugal	4.5	0.3	Portugal5
Coenagrionidae	Portugal	4.5	0.3	Portugal5
Coenagrionidae	Portugal	4.6	0.2	Portugal5
Coenagrionidae	Portugal	4.8	0.5	Portugal5
Coenagrionidae	Portugal	4.9	0.3	Portugal5
Coenagrionidae	Portugal	4.9	0.2	Portugal5
Coenagrionidae	Portugal	5.4	0.3	Portugal5
Coenagrionidae	Portugal	5.4	0.3	Portugal5
Coenagrionidae	Portugal	5.5	0.3	Portugal5
Coenagrionidae	Portugal	5.5	0.2	Portugal5
Coenagrionidae	Portugal	5.5	0.1	Portugal5
Coenagrionidae	Portugal	5.6	0.6	Portugal5
Coenagrionidae	Portugal	5.6	0.2	Portugal5
Coenagrionidae	Portugal	5.7	0.5	Portugal5
Coenagrionidae	Portugal	5.7	0.7	Portugal5
Coenagrionidae	Portugal	5.8	0.5	Portugal5
Coenagrionidae	Portugal	6	0.5	Portugal5
Coenagrionidae	Portugal	6.2	0.7	Portugal5
Coenagrionidae	Portugal	6.2	0.3	Portugal5
Coenagrionidae	Portugal	6.3	0.6	Portugal5
Coenagrionidae	Portugal	6.3	0.5	Portugal5
Coenagrionidae	Portugal	6.3	0.6	Portugal5
Coenagrionidae	Portugal	6.3	0.4	Portugal5
Coenagrionidae	Portugal	6.4	0.5	Portugal5
Coenagrionidae	Portugal	6.5	0.4	Portugal5
Coenagrionidae	Portugal	6.5	0.4	Portugal5
Coenagrionidae	Portugal	6.6	0.3	Portugal5
Coenagrionidae	Portugal	6.6	0.5	Portugal5
Coenagrionidae	Portugal	6.7	0.8	Portugal5
Coenagrionidae	Portugal	6.8	0.9	Portugal5
Coenagrionidae	Portugal	6.8	0.7	Portugal5
Coenagrionidae	Portugal	6.9	0.7	Portugal5
Coenagrionidae	Portugal	6.9	0.4	Portugal5
Coenagrionidae	Portugal	6.9	0.7	Portugal5
Coenagrionidae	Portugal	7	0.5	Portugal5
Coenagrionidae	Portugal	7	0.4	Portugal5
Coenagrionidae	Portugal	7	0.3	Portugal5
Coenagrionidae	Portugal	7.1	0.6	Portugal5
Coenagrionidae	Portugal	7.1	0.8	Portugal5
Coenagrionidae	Portugal	7.3	0.8	Portugal5
Coenagrionidae	Portugal	7.4	0.4	Portugal5
Coenagrionidae	Portugal	7.4	0.5	Portugal5
Coenagrionidae	Portugal	7.5	0.4	Portugal5
Coenagrionidae	Portugal	7.5	0.9	Portugal5
Coenagrionidae	Portugal	7.5	0.9	Portugal5
Coenagrionidae	Portugal	7.6	0.6	Portugal5
Coenagrionidae	Portugal	7.6	0.5	Portugal5
Coenagrionidae	Portugal	7.6	0.8	Portugal5
Coenagrionidae	Portugal	7.7	1	Portugal5
Coenagrionidae	Portugal	7.8	0.6	Portugal5
Coenagrionidae	Portugal	7.8	0.6	Portugal5
Coenagrionidae	Portugal	7.9	0.4	Portugal5
Coenagrionidae	Portugal	8	0.6	Portugal5
Coenagrionidae	Portugal	8.1	1	Portugal5
Coenagrionidae	Portugal	8.1	0.9	Portugal5
Coenagrionidae	Portugal	8.3	1.2	Portugal5
Coenagrionidae	Portugal	8.3	0.5	Portugal5
Coenagrionidae	Portugal	8.4	1	Portugal5
Coenagrionidae	Portugal	8.7	1.6	Portugal5
Coenagrionidae	Portugal	8.7	1.1	Portugal5
Coenagrionidae	Portugal	8.8	0.9	Portugal5
Coenagrionidae	Portugal	8.8	1.3	Portugal5
Coenagrionidae	Portugal	8.8	0.9	Portugal5
Coenagrionidae	Portugal	8.8	1.2	Portugal5
Coenagrionidae	Portugal	9	1.4	Portugal5
Coenagrionidae	Portugal	9	1.2	Portugal5
Coenagrionidae	Portugal	9.1	1.4	Portugal5
Coenagrionidae	Portugal	9.2	1	Portugal5
Coenagrionidae	Portugal	9.3	1.4	Portugal5
Coenagrionidae	Portugal	9.5	1	Portugal5
Coenagrionidae	Portugal	10	1	Portugal5
Coenagrionidae	Portugal	10.3	1.3	Portugal5
Coenagrionidae	Portugal	10.4	1.2	Portugal5
Coenagrionidae	Portugal	13.4	5.3	Portugal5
Coenagrionidae	Portugal	16.7	7.2	Portugal5
Coenagrionidae	Portugal	17	6.2	Portugal5
Coenagrionidae	Portugal	17.3	5.6	Portugal5
Coenagrionidae	Portugal	17.6	13	Portugal5
Coenagrionidae	Portugal	17.8	12.9	Portugal5
Coenagrionidae	Portugal	18.4	13.9	Portugal5
Coenagrionidae	Portugal	18.4	13.4	Portugal5
Coenagrionidae	Portugal	18.5	14.1	Portugal5
Coenagrionidae	Portugal	18.8	13.3	Portugal5
Coenagrionidae	Portugal	19.7	8.1	Portugal5
Coenagrionidae	Portugal	3.4	0.1	Portugal8
Coenagrionidae	Portugal	4.8	0.3	Portugal8
Coenagrionidae	Portugal	5	0.3	Portugal8
Coenagrionidae	Portugal	11.2	0.9	Portugal8
Coenagrionidae	Portugal	12.3	1.6	Portugal8
Coenagrionidae	Portugal	13.2	1.3	Portugal8
Coenagrionidae	Portugal	13.6	2.6	Portugal8
Coenagrionidae	Portugal	13.7	3.8	Portugal8
Coenagrionidae	Portugal	14.4	1.8	Portugal8
Coenagrionidae	Portugal	14.6	2.9	Portugal8
Coenagrionidae	Portugal	15.5	2.6	Portugal8
Coenagrionidae	Portugal	15.5	2.1	Portugal8
Coenagrionidae	Portugal	15.8	2.9	Portugal8
Coenagrionidae	Portugal	16.2	2.5	Portugal8
Coenagrionidae	Portugal	16.3	3.6	Portugal8
Coenagrionidae	Portugal	16.5	4.5	Portugal8
Coenagrionidae	Portugal	17	5.3	Portugal8
Coenagrionidae	Portugal	17.1	4.8	Portugal8
Coenagrionidae	Portugal	17.3	6.5	Portugal8
Coenagrionidae	Portugal	17.4	9.1	Portugal8
Coenagrionidae	Portugal	17.7	9.2	Portugal8
Coenagrionidae	Portugal	17.9	5.3	Portugal8
Coenagrionidae	Portugal	17.9	4.7	Portugal8
Coenagrionidae	Portugal	18.1	3.6	Portugal8
Coenagrionidae	Portugal	18.2	9.4	Portugal8
Coenagrionidae	Portugal	18.2	3.5	Portugal8
Coenagrionidae	Portugal	18.2	5.1	Portugal8
Coenagrionidae	Portugal	18.3	5.4	Portugal8
Coenagrionidae	Portugal	18.3	3.1	Portugal8
Coenagrionidae	Portugal	18.4	9.6	Portugal8
Coenagrionidae	Portugal	18.6	10.5	Portugal8
Coenagrionidae	Portugal	18.6	6.6	Portugal8
Coenagrionidae	Portugal	18.7	9.4	Portugal8
Coenagrionidae	Portugal	18.7	8.4	Portugal8
Coenagrionidae	Portugal	18.7	6.6	Portugal8
Coenagrionidae	Portugal	18.7	7	Portugal8
Coenagrionidae	Portugal	18.8	5.8	Portugal8
Coenagrionidae	Portugal	19	7.7	Portugal8
Coenagrionidae	Portugal	19	4.3	Portugal8
Coenagrionidae	Portugal	19.1	9.5	Portugal8
Coenagrionidae	Portugal	19.1	4	Portugal8
Coenagrionidae	Portugal	19.2	7.1	Portugal8
Coenagrionidae	Portugal	19.3	8.3	Portugal8
Coenagrionidae	Portugal	19.4	5.8	Portugal8
Coenagrionidae	Portugal	19.5	8.1	Portugal8
Coenagrionidae	Portugal	19.6	6.3	Portugal8
Coenagrionidae	Portugal	19.7	7.9	Portugal8
Coenagrionidae	Portugal	19.7	4.8	Portugal8
Coenagrionidae	Portugal	19.9	4.8	Portugal8
Coenagrionidae	Portugal	19.9	4.6	Portugal8
Coenagrionidae	Portugal	19.9	6.8	Portugal8
Coenagrionidae	Portugal	20	7.4	Portugal8
Coenagrionidae	Portugal	20	7.7	Portugal8
Coenagrionidae	Portugal	20	7.6	Portugal8
Coenagrionidae	Portugal	20.1	5.3	Portugal8
Coenagrionidae	Portugal	20.3	5.7	Portugal8
Coenagrionidae	Portugal	20.7	5.5	Portugal8
Coenagrionidae	Portugal	21.9	8.9	Portugal8
Aeshnidae	Sweden	10.2	1.3	Sweden2
Aeshnidae	Sweden	9.7	1.1	Sweden2
Aeshnidae	Sweden	9.1	1.4	Sweden2
Aeshnidae	Sweden	6.4	0.7	Sweden2
Aeshnidae	Sweden	6.6	0.5	Sweden2
Aeshnidae	Sweden	6.1	0.4	Sweden2
Aeshnidae	Sweden	6.2	0.7	Sweden2
Aeshnidae	Sweden	8.6	0.8	Sweden2
Aeshnidae	Sweden	9.8	1.1	Sweden2
Aeshnidae	Sweden	10	1.7	Sweden2
Aeshnidae	Sweden	7.1	0.6	Sweden2
Aeshnidae	Sweden	6.5	0.7	Sweden2
Aeshnidae	Sweden	6.5	0.4	Sweden2
Aeshnidae	Sweden	11.3	1.7	Sweden2
Aeshnidae	Sweden	9.9	1.6	Sweden2
Aeshnidae	Sweden	10	1.8	Sweden2
Aeshnidae	Sweden	15	1.4	Sweden2
Aeshnidae	Sweden	13.1	1.2	Sweden2
Aeshnidae	Sweden	13	1.6	Sweden2
Aeshnidae	Sweden	14.1	1.1	Sweden2
Aeshnidae	Sweden	9.3	1.2	Sweden2
Aeshnidae	Sweden	12.8	1.5	Sweden2
Aeshnidae	Sweden	12.6	2.9	Sweden2
Aeshnidae	Sweden	6.4	0.4	Sweden2
Aeshnidae	Sweden	13.3	2.3	Sweden2
Aeshnidae	Sweden	12.1	1.7	Sweden2
Aeshnidae	Sweden	12.5	1.5	Sweden2
Aeshnidae	Sweden	19	13.3	Sweden2
Aeshnidae	Sweden	18	7.7	Sweden2
Aeshnidae	Sweden	16.1	6.8	Sweden2
Aeshnidae	Sweden	22.5	22	Sweden2
Aeshnidae	Sweden	23.3	34.9	Sweden2
Aeshnidae	Sweden	4.3	0.2	Sweden4
Aeshnidae	Portugal	5.2	0.7	Portugal3
Aeshnidae	Portugal	22.3	18.7	Portugal4
Aeshnidae	Portugal	24.2	48.6	Portugal4
Aeshnidae	Portugal	27.1	43.1	Portugal4
Aeshnidae	Portugal	31.5	68.4	Portugal4
Aeshnidae	Portugal	33.4	98.6	Portugal4
Aeshnidae	Portugal	33.5	56.3	Portugal4
Aeshnidae	Portugal	5.9	0.8	Portugal7
Aeshnidae	Portugal	6.7	0.4	Portugal7
Aeshnidae	Portugal	9.5	1.8	Portugal7
Aeshnidae	Portugal	13.7	7.8	Portugal7
Aeshnidae	Portugal	14.2	7.4	Portugal7
Aeshnidae	Portugal	14.3	7.7	Portugal7
Aeshnidae	Portugal	15.3	12.3	Portugal7
Aeshnidae	Portugal	15.5	11.9	Portugal7
Aeshnidae	Portugal	15.8	17.5	Portugal7
Aeshnidae	Portugal	16	14.8	Portugal7
Aeshnidae	Portugal	16.7	15.8	Portugal7
Aeshnidae	Portugal	17.2	17.6	Portugal7
Aeshnidae	Portugal	17.8	20.9	Portugal7
Aeshnidae	Portugal	18.5	16.5	Portugal7
Aeshnidae	Portugal	18.6	17.4	Portugal7
Aeshnidae	Portugal	19	13.3	Portugal7
Aeshnidae	Portugal	19	17.7	Portugal7
Aeshnidae	Portugal	19.1	17.5	Portugal7
Aeshnidae	Portugal	20	12.2	Portugal7
Aeshnidae	Portugal	20.1	19.4	Portugal7
Aeshnidae	Portugal	20.8	23.5	Portugal7
Aeshnidae	Portugal	21	26.2	Portugal7
Aeshnidae	Portugal	21.1	47.6	Portugal7
Aeshnidae	Portugal	21.3	46.2	Portugal7
Aeshnidae	Portugal	21.3	30.5	Portugal7
Aeshnidae	Portugal	21.5	21.6	Portugal7
Aeshnidae	Portugal	21.7	41.7	Portugal7
Aeshnidae	Portugal	21.7	21	Portugal7
Aeshnidae	Portugal	21.8	32.1	Portugal7
Aeshnidae	Portugal	21.8	23	Portugal7
Aeshnidae	Portugal	21.9	22.9	Portugal7
Aeshnidae	Portugal	22	28.7	Portugal7
Aeshnidae	Portugal	22.1	38.9	Portugal7
Aeshnidae	Portugal	22.4	36.5	Portugal7
Aeshnidae	Portugal	22.4	41.7	Portugal7
Aeshnidae	Portugal	23	30.2	Portugal7
Aeshnidae	Portugal	23.7	34.5	Portugal7
Aeshnidae	Portugal	25.6	33.1	Portugal7
Aeshnidae	Portugal	26.2	48.9	Portugal7
Aeshnidae	Portugal	26.4	40.1	Portugal7
Aeshnidae	Portugal	26.4	39	Portugal7
Aeshnidae	Portugal	26.5	25.7	Portugal7
Aeshnidae	Portugal	27	51.9	Portugal7
Aeshnidae	Portugal	27.1	53.9	Portugal7
Aeshnidae	Portugal	29.1	38.7	Portugal7
Aeshnidae	Portugal	29.8	45.5	Portugal7
Aeshnidae	Portugal	30.9	76.7	Portugal7
Aeshnidae	Portugal	33.1	100.9	Portugal7
Sympetrum	Sweden	7.6	1.3	Sweden2
Sympetrum	Sweden	7.9	1.4	Sweden2
Sympetrum	Sweden	7.3	1.4	Sweden2
Sympetrum	Sweden	7.8	1.4	Sweden2
Sympetrum	Sweden	7.1	1.4	Sweden2
Sympetrum	Sweden	7.3	1.3	Sweden2
Sympetrum	Sweden	7.8	1.3	Sweden2
Sympetrum	Sweden	7.4	1.5	Sweden2
Sympetrum	Sweden	5.4	0.6	Sweden2
Sympetrum	Sweden	7.8	1.9	Sweden2
Sympetrum	Sweden	7.1	1	Sweden2
Sympetrum	Sweden	7.3	1.5	Sweden2
Sympetrum	Sweden	7	1.4	Sweden2
Sympetrum	Sweden	7.5	1.4	Sweden2
Sympetrum	Sweden	7.6	1.7	Sweden2
Sympetrum	Sweden	8.5	1.8	Sweden2
Sympetrum	Sweden	7.2	1.5	Sweden2
Sympetrum	Sweden	10.2	3	Sweden2
Sympetrum	Sweden	11	3.3	Sweden2
Sympetrum	Sweden	11	3.2	Sweden2
Sympetrum	Sweden	9.9	3.8	Sweden2
Sympetrum	Sweden	10.6	3.3	Sweden2
Sympetrum	Sweden	10.7	3	Sweden2
Sympetrum	Sweden	10.4	2.7	Sweden2
Sympetrum	Sweden	10	2.8	Sweden2
Sympetrum	Sweden	7.1	1.8	Sweden2
Sympetrum	Sweden	8.4	1.7	Sweden2
Sympetrum	Sweden	7.9	1.1	Sweden2
Sympetrum	Sweden	9.5	2.3	Sweden2
Sympetrum	Sweden	10.1	2.8	Sweden2
Sympetrum	Sweden	9.7	2.1	Sweden2
Sympetrum	Sweden	11.1	3.8	Sweden2
Sympetrum	Sweden	10.8	1.6	Sweden2
Sympetrum	Sweden	10.8	2.8	Sweden2
Sympetrum	Sweden	10.8	2.9	Sweden2
Sympetrum	Sweden	9.9	1.8	Sweden2
Sympetrum	Sweden	11.1	3.2	Sweden2
Sympetrum	Sweden	10.9	3.1	Sweden2
Sympetrum	Sweden	10.9	2.5	Sweden2
Sympetrum	Sweden	10.7	3.1	Sweden2
Sympetrum	Sweden	11.2	4.6	Sweden2
Sympetrum	Sweden	10.5	2.2	Sweden2
Sympetrum	Sweden	11.2	3.8	Sweden2
Sympetrum	Sweden	11.1	1.8	Sweden2
Sympetrum	Sweden	10.6	3.4	Sweden2
Sympetrum	Sweden	11.2	3.3	Sweden2
Sympetrum	Sweden	10.9	2.8	Sweden2
Sympetrum	Sweden	10.5	3.4	Sweden2
Sympetrum	Sweden	11.9	2.7	Sweden2
Sympetrum	Sweden	12.2	3	Sweden2
Sympetrum	Sweden	12	3.5	Sweden2
Sympetrum	Sweden	10.6	3.4	Sweden2
Sympetrum	Sweden	10.1	2.1	Sweden2
Sympetrum	Sweden	7.5	1.6	Sweden4
Sympetrum	Sweden	7	0.9	Sweden4
Sympetrum	Sweden	6.7	0.8	Sweden4
Sympetrum	Sweden	7.6	1	Sweden4
Sympetrum	Sweden	5.3	0.6	Sweden4
Sympetrum	Sweden	5.5	0.6	Sweden4
Sympetrum	Sweden	7.2	1.2	Sweden4
Sympetrum	Sweden	6.1	1.1	Sweden4
Sympetrum	Sweden	6.5	0.7	Sweden4
Sympetrum	Sweden	4.8	0.9	Sweden4
Sympetrum	Sweden	3.8	0.2	Sweden4
Sympetrum	Sweden	4.9	0.6	Sweden4
Sympetrum	Sweden	8	0.6	Sweden4
Sympetrum	Sweden	8.1	1.5	Sweden4
Sympetrum	Sweden	7.7	1.7	Sweden4
Sympetrum	Sweden	8	1.2	Sweden4
Sympetrum	Sweden	8.3	1.4	Sweden4
Sympetrum	Sweden	6.9	0.5	Sweden4
Sympetrum	Sweden	5.5	0.5	Sweden4
Sympetrum	Sweden	14.7	5.4	Sweden5
Sympetrum	Sweden	15	9.6	Sweden5
Sympetrum	Sweden	15.3	5.5	Sweden5
Sympetrum	Sweden	15.2	10.1	Sweden5
Sympetrum	Sweden	15	9.1	Sweden5
Sympetrum	Sweden	9.3	3.2	Sweden5
Sympetrum	Sweden	16.2	15.9	Sweden5
Sympetrum	Sweden	11.8	4.4	Sweden5
Sympetrum	Sweden	15.5	7.8	Sweden5
Sympetrum	Sweden	14	7.2	Sweden5
Sympetrum	Sweden	16	8.7	Sweden5
Sympetrum	Portugal	13.1	8.2	Portugal4
Sympetrum	Portugal	13.5	10.9	Portugal4
Sympetrum	Portugal	13.5	7.6	Portugal4
Sympetrum	Portugal	15.3	13.1	Portugal4
Sympetrum	Portugal	15.6	16.9	Portugal4
Sympetrum	Portugal	16	23.7	Portugal4
Sympetrum	Portugal	16.1	16.3	Portugal4
Sympetrum	Portugal	16.4	16.6	Portugal4
Sympetrum	Portugal	16.9	18.9	Portugal4
Sympetrum	Portugal	17.1	22.9	Portugal4
Sympetrum	Portugal	17.6	35.5	Portugal4
Sympetrum	Portugal	17.8	28.2	Portugal4
Sympetrum	Portugal	6.1	1.6	Portugal5
Sympetrum	Portugal	7	2.4	Portugal5
Sympetrum	Portugal	7.2	1.1	Portugal5
Sympetrum	Portugal	11.2	12.7	Portugal5
Sympetrum	Portugal	12	9.7	Portugal5
Sympetrum	Portugal	12.5	6.2	Portugal5
Sympetrum	Portugal	12.6	8.7	Portugal5
Sympetrum	Portugal	13.4	10.5	Portugal5
Sympetrum	Portugal	13.6	10.9	Portugal5
Sympetrum	Portugal	15.5	23.2	Portugal5
Sympetrum	Portugal	15.9	18.4	Portugal5
Sympetrum	Portugal	16.4	20.2	Portugal5
Sympetrum	Portugal	16.4	13.7	Portugal5
Sympetrum	Portugal	16.6	35	Portugal5
Sympetrum	Portugal	16.6	33.2	Portugal5
Sympetrum	Portugal	16.7	33.5	Portugal5
Sympetrum	Portugal	16.7	14.8	Portugal5
Sympetrum	Portugal	16.8	24.6	Portugal5
Sympetrum	Portugal	16.9	27.6	Portugal5
Sympetrum	Portugal	17.1	28	Portugal5
Sympetrum	Portugal	17.2	36.6	Portugal5
Sympetrum	Portugal	17.2	30.6	Portugal5
Sympetrum	Portugal	17.2	33.9	Portugal5
Sympetrum	Portugal	17.3	32.4	Portugal5
Sympetrum	Portugal	17.4	33.4	Portugal5
Sympetrum	Portugal	17.5	37.7	Portugal5
Sympetrum	Portugal	17.6	25.9	Portugal5
Sympetrum	Portugal	17.6	35.5	Portugal5
Sympetrum	Portugal	17.7	37.4	Portugal5
Sympetrum	Portugal	17.8	29.8	Portugal5
Sympetrum	Portugal	18	42.2	Portugal5
Sympetrum	Portugal	18	35.3	Portugal5
Sympetrum	Portugal	18	30.2	Portugal5
Sympetrum	Portugal	19.2	38	Portugal5
Sympetrum	Portugal	17	27.3	Portugal6
Sympetrum	Portugal	5.6	0.1	Portugal7
Sympetrum	Portugal	9.5	4.4	Portugal7
Sympetrum	Portugal	10.8	7.2	Portugal7
Sympetrum	Portugal	11	7.3	Portugal7
Sympetrum	Portugal	11.4	6.4	Portugal7
Sympetrum	Portugal	11.5	9.2	Portugal7
Sympetrum	Portugal	11.5	6.7	Portugal7
Sympetrum	Portugal	11.6	5	Portugal7
Sympetrum	Portugal	11.7	7.2	Portugal7
Sympetrum	Portugal	11.9	7.9	Portugal7
Sympetrum	Portugal	12	7.4	Portugal7
Sympetrum	Portugal	12.2	10.2	Portugal7
Sympetrum	Portugal	12.3	8.1	Portugal7
Sympetrum	Portugal	12.8	8.1	Portugal7
Sympetrum	Portugal	13.5	6.8	Portugal7
Sympetrum	Portugal	13.6	6.3	Portugal7
Sympetrum	Portugal	14.4	7	Portugal7
Sympetrum	Portugal	14.6	8.4	Portugal7
Sympetrum	Portugal	15	13.7	Portugal7
Sympetrum	Portugal	15.4	12.9	Portugal7
Sympetrum	Portugal	15.6	11.5	Portugal7
Sympetrum	Portugal	15.8	14.5	Portugal7
Sympetrum	Portugal	16.7	25.8	Portugal7
Sympetrum	Portugal	16.8	15.8	Portugal7
Sympetrum	Portugal	17	26	Portugal7
Sympetrum	Portugal	18.5	24	Portugal7
Sympetrum	Portugal	11.6	5.3	Portugal8
Sympetrum	Portugal	12.2	9.4	Portugal8
Sympetrum	Portugal	12.5	6.8	Portugal8
Sympetrum	Portugal	12.6	8.1	Portugal8
Sympetrum	Portugal	12.6	3.8	Portugal8
Sympetrum	Portugal	12.8	7.5	Portugal8
Sympetrum	Portugal	12.8	7.5	Portugal8
Sympetrum	Portugal	12.9	8.8	Portugal8
Sympetrum	Portugal	13.3	5.3	Portugal8
Sympetrum	Portugal	13.7	7.1	Portugal8
Sympetrum	Portugal	15.6	22.6	Portugal8
Sympetrum	Portugal	15.8	12.6	Portugal8
Sympetrum	Portugal	16.5	12	Portugal8
Sympetrum	Portugal	17	16.4	Portugal8
Sympetrum	Portugal	17.1	31.9	Portugal8
Sympetrum	Portugal	17.4	35.9	Portugal8
Sympetrum	Portugal	17.9	37.8	Portugal8
Sympetrum	Portugal	7.2	2.5	Portugal9
Sympetrum	Portugal	11	5.2	Portugal9
Sympetrum	Portugal	11.2	4.6	Portugal9
Sympetrum	Portugal	11.5	5.7	Portugal9
Sympetrum	Portugal	11.9	5.2	Portugal9
Sympetrum	Portugal	12.2	5.9	Portugal9
Sympetrum	Portugal	16.9	22.8	Portugal9
Corixidae	Sweden	4.3	0.3	Sweden1
Corixidae	Sweden	4.4	0.4	Sweden1
Corixidae	Sweden	7.8	3.3	Sweden1
Corixidae	Sweden	3	0.3	Sweden3
Corixidae	Sweden	2.5	0.2	Sweden3
Corixidae	Sweden	2.3	0.1	Sweden3
Corixidae	Sweden	3.3	0.3	Sweden3
Corixidae	Sweden	3.5	0.5	Sweden3
Corixidae	Sweden	4.9	0.4	Sweden3
Corixidae	Sweden	8	4.3	Sweden3
Corixidae	Sweden	4.6	0.7	Sweden5
Corixidae	Sweden	4.3	0.8	Sweden5
Corixidae	Sweden	5.5	1.2	Sweden5
Corixidae	Sweden	5.8	0.7	Sweden5
Corixidae	Sweden	4.2	0.5	Sweden5
Corixidae	Sweden	5.6	0.8	Sweden5
Corixidae	Sweden	5.6	0.9	Sweden5
Corixidae	Sweden	4.2	0.4	Sweden5
Corixidae	Sweden	5.6	0.8	Sweden5
Corixidae	Sweden	4.5	0.4	Sweden5
Corixidae	Sweden	4.3	0.7	Sweden5
Corixidae	Sweden	5.7	1	Sweden5
Corixidae	Sweden	5.9	0.8	Sweden5
Corixidae	Sweden	4.7	0.7	Sweden5
Corixidae	Sweden	4	0.7	Sweden5
Corixidae	Sweden	5.8	0.9	Sweden5
Corixidae	Sweden	5.7	1.1	Sweden5
Corixidae	Sweden	4.2	0.8	Sweden5
Corixidae	Sweden	5.1	0.9	Sweden5
Corixidae	Sweden	2.7	0.2	Sweden5
Corixidae	Sweden	3.9	0.6	Sweden5
Corixidae	Sweden	3.9	0.8	Sweden5
Corixidae	Sweden	3.8	0.4	Sweden5
Corixidae	Sweden	5.7	0.9	Sweden5
Corixidae	Sweden	4.4	0.5	Sweden5
Corixidae	Sweden	5.4	0.9	Sweden5
Corixidae	Sweden	5.5	1.1	Sweden5
Corixidae	Sweden	5.5	1.1	Sweden5
Corixidae	Sweden	5.4	1.1	Sweden5
Corixidae	Sweden	5.3	0.7	Sweden5
Corixidae	Sweden	5.4	0.8	Sweden5
Corixidae	Sweden	5.3	0.7	Sweden5
Corixidae	Sweden	6.1	0.7	Sweden5
Corixidae	Sweden	5.3	0.7	Sweden5
Corixidae	Sweden	5.2	0.8	Sweden5
Corixidae	Sweden	5.2	0.9	Sweden5
Corixidae	Sweden	4.1	0.4	Sweden5
Corixidae	Sweden	4	0.6	Sweden5
Corixidae	Sweden	3.2	0.4	Sweden5
Corixidae	Sweden	4.1	0.5	Sweden5
Corixidae	Sweden	3.8	0.5	Sweden5
Corixidae	Sweden	3.4	0.2	Sweden5
Corixidae	Sweden	3	0.2	Sweden5
Corixidae	Sweden	3.3	0.15	Sweden5
Corixidae	Sweden	2.8	0.133333	Sweden5
Corixidae	Sweden	2.9	0.233333	Sweden5
Corixidae	Sweden	3.2	0.3	Sweden5
Corixidae	Sweden	2.7	0.166667	Sweden5
Corixidae	Sweden	3	0.2	Sweden5
Corixidae	Sweden	3.5	0.2	Sweden5
Corixidae	Sweden	2.9	0.166667	Sweden5
Corixidae	Sweden	2	0.05	Sweden5
Corixidae	Sweden	3.1	0.15	Sweden5
Corixidae	Sweden	1.8	0.05	Sweden5
Corixidae	Sweden	1.7	0.1	Sweden5
Corixidae	Sweden	2.2	0.15	Sweden5
Corixidae	Sweden	2.7	0.35	Sweden5
Corixidae	Sweden	2.5	0.05	Sweden5
Corixidae	Sweden	1.6	0.0666667	Sweden5
Corixidae	Sweden	1.9	0.05	Sweden5
Corixidae	Sweden	1.5	0.0666667	Sweden5
Corixidae	Sweden	2.6	0.2	Sweden5
Corixidae	Sweden	2.8	0.2	Sweden5
Corixidae	Sweden	3.4	0.25	Sweden5
Corixidae	Sweden	3.1	0.2	Sweden5
Corixidae	Sweden	4	0.4	Sweden5
Corixidae	Sweden	3.3	0.45	Sweden5
Corixidae	Sweden	3.8	0.5	Sweden5
Corixidae	Sweden	3.5	0.3	Sweden5
Corixidae	Sweden	7.1	2.5	Sweden5
Corixidae	Sweden	7.2	2.8	Sweden5
Corixidae	Sweden	7.2	2.4	Sweden5
Corixidae	Sweden	7.5	3.1	Sweden5
Corixidae	Sweden	7.5	3.1	Sweden5
Corixidae	Sweden	7.6	2.7	Sweden5
Corixidae	Sweden	7.6	4	Sweden5
Corixidae	Sweden	7.8	4.4	Sweden5
Corixidae	Sweden	7.8	3.4	Sweden5
Corixidae	Sweden	7.9	3.4	Sweden5
Corixidae	Sweden	8.3	5.1	Sweden5
Corixidae	Portugal	3.2	0.3	Portugal4
Corixidae	Portugal	3.4	0.6	Portugal4
Corixidae	Portugal	3.5	0.7	Portugal4
Corixidae	Portugal	3.8	0.7	Portugal4
Corixidae	Portugal	4.2	1	Portugal4
Corixidae	Portugal	5	1.3	Portugal4
Corixidae	Portugal	5	0.9	Portugal4
Corixidae	Portugal	5	1.3	Portugal4
Corixidae	Portugal	5.1	0.7	Portugal4
Corixidae	Portugal	5.2	1.3	Portugal4
Corixidae	Portugal	6.4	1.7	Portugal4
Corixidae	Portugal	6.9	1.6	Portugal4
Corixidae	Portugal	6.9	2.4	Portugal4
Corixidae	Portugal	7.1	2.9	Portugal4
Corixidae	Portugal	7.2	3.2	Portugal4
Corixidae	Portugal	3	0.8	Portugal6
Corixidae	Portugal	3.2	0.5	Portugal6
Corixidae	Portugal	3.2	0.6	Portugal6
Corixidae	Portugal	3.3	0.7	Portugal6
Corixidae	Portugal	3.5	0.7	Portugal6
Corixidae	Portugal	3.5	0.4	Portugal6
Corixidae	Portugal	3.6	0.5	Portugal6
Corixidae	Portugal	4	1	Portugal6
Corixidae	Portugal	4.3	1.7	Portugal6
Corixidae	Portugal	4.6	1.1	Portugal6
Corixidae	Portugal	4.8	0.5	Portugal6
Corixidae	Portugal	4.9	1	Portugal6
Corixidae	Portugal	4.9	1	Portugal6
Corixidae	Portugal	4.9	1.6	Portugal6
Corixidae	Portugal	6.3	3.3	Portugal6
Corixidae	Portugal	6.6	2.8	Portugal6
Corixidae	Portugal	6.7	3	Portugal6
Corixidae	Portugal	6.7	2.7	Portugal6
Corixidae	Portugal	7.1	2.6	Portugal6
Corixidae	Portugal	4.7	1.1	Portugal8
Corixidae	Portugal	6.2	2.9	Portugal8
Corixidae	Portugal	6.5	2	Portugal8
Corixidae	Portugal	6.6	3.1	Portugal8
Corixidae	Portugal	6.6	2	Portugal8
Corixidae	Portugal	6.9	3	Portugal8
Corixidae	Portugal	7	2.8	Portugal8
Corixidae	Portugal	3.4	0.9	Portugal9
Corixidae	Portugal	3.8	0.8	Portugal9
Corixidae	Portugal	4	1.2	Portugal9
Corixidae	Portugal	4.2	0.9	Portugal9
Corixidae	Portugal	6.8	1.6	Portugal9
Notonecta	Sweden	3.9	0.6	Sweden1
Notonecta	Sweden	5.7	0.8	Sweden1
Notonecta	Sweden	3.8	0.4	Sweden1
Notonecta	Sweden	3.9	0.4	Sweden1
Notonecta	Sweden	2.9	0.2	Sweden1
Notonecta	Sweden	4.2	1.1	Sweden1
Notonecta	Sweden	3.8	0.6	Sweden1
Notonecta	Sweden	4.1	0.9	Sweden1
Notonecta	Sweden	2.8	0.3	Sweden1
Notonecta	Sweden	2.8	0.4	Sweden1
Notonecta	Sweden	4.2	0.9	Sweden1
Notonecta	Sweden	3.9	0.4	Sweden1
Notonecta	Sweden	5.9	1.3	Sweden1
Notonecta	Sweden	2.5	0.4	Sweden1
Notonecta	Sweden	3.8	0.6	Sweden1
Notonecta	Sweden	4.2	1	Sweden2
Notonecta	Sweden	4.3	1.1	Sweden2
Notonecta	Sweden	4	0.7	Sweden2
Notonecta	Sweden	2.4	0.1	Sweden2
Notonecta	Sweden	4.4	1.2	Sweden2
Notonecta	Sweden	4.3	1.1	Sweden2
Notonecta	Sweden	4	0.8	Sweden2
Notonecta	Sweden	4	0.7	Sweden2
Notonecta	Sweden	4.1	1	Sweden2
Notonecta	Sweden	2.5	0.1	Sweden2
Notonecta	Sweden	2.5	0.1	Sweden2
Notonecta	Sweden	2.6	0.3	Sweden2
Notonecta	Sweden	5.7	1	Sweden2
Notonecta	Sweden	6.1	2.3	Sweden2
Notonecta	Sweden	5.9	1.8	Sweden2
Notonecta	Sweden	6	1.6	Sweden2
Notonecta	Sweden	5.6	1	Sweden2
Notonecta	Sweden	6	1.7	Sweden2
Notonecta	Sweden	5.9	1.4	Sweden2
Notonecta	Sweden	6.1	2.4	Sweden2
Notonecta	Sweden	5.7	1	Sweden2
Notonecta	Sweden	6.4	2.9	Sweden2
Notonecta	Sweden	6.1	3	Sweden2
Notonecta	Sweden	6.5	2.6	Sweden2
Notonecta	Sweden	5.6	0.8	Sweden2
Notonecta	Sweden	7.8	2.7	Sweden2
Notonecta	Sweden	8.2	2.9	Sweden2
Notonecta	Sweden	2.7	0.1	Sweden3
Notonecta	Sweden	2.6	0.1	Sweden3
Notonecta	Sweden	2.6	0.2	Sweden3
Notonecta	Sweden	15	36.7	Sweden3
Notonecta	Sweden	15.2	42.8	Sweden3
Notonecta	Sweden	15.8	49.6	Sweden3
Notonecta	Sweden	2.7	0.2	Sweden4
Notonecta	Sweden	2.8	0.4	Sweden4
Notonecta	Sweden	2.7	0.1	Sweden4
Notonecta	Sweden	3.7	0.4	Sweden4
Notonecta	Sweden	15.5	49.1	Sweden4
Notonecta	Sweden	15.6	46.3	Sweden4
Notonecta	Sweden	16	48.1	Sweden4
Notonecta	Sweden	16.5	45.3	Sweden4
Notonecta	Sweden	6	2.6	Sweden5
Notonecta	Sweden	6.2	2.5	Sweden5
Notonecta	Sweden	6.2	3.5	Sweden5
Notonecta	Sweden	5.6	2.6	Sweden5
Notonecta	Sweden	8.7	3.1	Sweden5
Notonecta	Sweden	8.6	3.4	Sweden5
Notonecta	Sweden	8.8	4.8	Sweden5
Notonecta	Sweden	5.8	1.6	Sweden5
Notonecta	Sweden	8.4	2.9	Sweden5
Notonecta	Sweden	16.9	41.4	Sweden5
Notonecta	Sweden	17.5	54.4	Sweden5
Notonecta	Portugal	2.5	0.6	Portugal3
Notonecta	Portugal	2.6	0.9	Portugal3
Notonecta	Portugal	3.3	0.4	Portugal3
Notonecta	Portugal	3.3	1.1	Portugal3
Notonecta	Portugal	3.4	1	Portugal3
Notonecta	Portugal	3.5	0.9	Portugal3
Notonecta	Portugal	3.7	1.3	Portugal3
Notonecta	Portugal	4.4	1.3	Portugal3
Notonecta	Portugal	5.1	3.1	Portugal3
Notonecta	Portugal	5.1	1.9	Portugal3
Notonecta	Portugal	5.2	2.4	Portugal3
Notonecta	Portugal	5.2	2.8	Portugal3
Notonecta	Portugal	5.3	2.3	Portugal3
Notonecta	Portugal	5.8	2.5	Portugal3
Notonecta	Portugal	5.8	3.2	Portugal3
Notonecta	Portugal	6.8	3.5	Portugal3
Notonecta	Portugal	6.9	4.3	Portugal3
Notonecta	Portugal	7	2.3	Portugal3
Notonecta	Portugal	7.1	7	Portugal3
Notonecta	Portugal	7.2	4.2	Portugal3
Notonecta	Portugal	7.4	4.2	Portugal3
Notonecta	Portugal	7.5	5.5	Portugal3
Notonecta	Portugal	7.5	6.3	Portugal3
Notonecta	Portugal	7.6	5.7	Portugal3
Notonecta	Portugal	7.8	6.4	Portugal3
Notonecta	Portugal	7.8	6.3	Portugal3
Notonecta	Portugal	7.8	5.6	Portugal3
Notonecta	Portugal	8	6.9	Portugal3
Notonecta	Portugal	8.1	6.4	Portugal3
Notonecta	Portugal	8.1	6.2	Portugal3
Notonecta	Portugal	8.2	7.2	Portugal3
Notonecta	Portugal	8.2	6.2	Portugal3
Notonecta	Portugal	8.2	6.5	Portugal3
Notonecta	Portugal	8.3	6.1	Portugal3
Notonecta	Portugal	8.4	7.8	Portugal3
Notonecta	Portugal	8.4	8	Portugal3
Notonecta	Portugal	8.5	7.8	Portugal3
Notonecta	Portugal	8.6	7	Portugal3
Notonecta	Portugal	8.6	7.4	Portugal3
Notonecta	Portugal	8.8	6.2	Portugal3
Notonecta	Portugal	9	7.1	Portugal3
Notonecta	Portugal	9.2	6.9	Portugal3
Notonecta	Portugal	10.2	21	Portugal3
Notonecta	Portugal	10.5	17.8	Portugal3
Notonecta	Portugal	14.3	35.3	Portugal3
Notonecta	Portugal	14.4	31.5	Portugal3
Notonecta	Portugal	14.4	30.1	Portugal3
Notonecta	Portugal	14.6	30.9	Portugal3
Notonecta	Portugal	14.7	39.7	Portugal3
Notonecta	Portugal	14.7	30.8	Portugal3
Notonecta	Portugal	14.8	31.3	Portugal3
Notonecta	Portugal	14.8	33.1	Portugal3
Notonecta	Portugal	14.9	35.8	Portugal3
Notonecta	Portugal	14.9	32.8	Portugal3
Notonecta	Portugal	15	33.9	Portugal3
Notonecta	Portugal	15.1	31.2	Portugal3
Notonecta	Portugal	15.3	35.2	Portugal3
Notonecta	Portugal	15.4	39.8	Portugal3
Notonecta	Portugal	15.5	32.7	Portugal3
Notonecta	Portugal	15.7	38	Portugal3
Notonecta	Portugal	15.7	38.1	Portugal3
Notonecta	Portugal	2.4	0.3	Portugal4
Notonecta	Portugal	2.6	0.6	Portugal4
Notonecta	Portugal	2.7	0.2	Portugal4
Notonecta	Portugal	3.1	0.1	Portugal4
Notonecta	Portugal	3.2	0.6	Portugal4
Notonecta	Portugal	3.4	0.4	Portugal4
Notonecta	Portugal	3.6	0.7	Portugal4
Notonecta	Portugal	3.6	0.7	Portugal4
Notonecta	Portugal	3.8	1	Portugal4
Notonecta	Portugal	3.8	1	Portugal4
Notonecta	Portugal	3.9	1	Portugal4
Notonecta	Portugal	3.9	1.1	Portugal4
Notonecta	Portugal	4.3	0.2	Portugal4
Notonecta	Portugal	4.4	0.9	Portugal4
Notonecta	Portugal	5.2	1.6	Portugal4
Notonecta	Portugal	5.3	2	Portugal4
Notonecta	Portugal	5.4	1.8	Portugal4
Notonecta	Portugal	7	3.5	Portugal4
Notonecta	Portugal	7	3.9	Portugal4
Notonecta	Portugal	7.1	3.7	Portugal4
Notonecta	Portugal	7.1	4.3	Portugal4
Notonecta	Portugal	7.2	4	Portugal4
Notonecta	Portugal	7.4	4.1	Portugal4
Notonecta	Portugal	7.9	5.3	Portugal4
Notonecta	Portugal	8.5	4.1	Portugal4
Notonecta	Portugal	8.7	6.2	Portugal4
Notonecta	Portugal	8.7	6.4	Portugal4
Notonecta	Portugal	8.9	5.3	Portugal4
Notonecta	Portugal	9	5	Portugal4
Notonecta	Portugal	9.1	4.4	Portugal4
Notonecta	Portugal	9.1	6	Portugal4
Notonecta	Portugal	9.2	4.5	Portugal4
Notonecta	Portugal	9.2	5.1	Portugal4
Notonecta	Portugal	9.4	5.3	Portugal4
Notonecta	Portugal	9.4	5.8	Portugal4
Notonecta	Portugal	10.7	20.9	Portugal4
Notonecta	Portugal	11.3	24.3	Portugal4
Notonecta	Portugal	15.5	48.2	Portugal4
Notonecta	Portugal	15.6	47	Portugal4
Notonecta	Portugal	16.5	45.3	Portugal4
Notonecta	Portugal	2.4	0.2	Portugal5
Notonecta	Portugal	2.7	0.1	Portugal5
Notonecta	Portugal	2.8	0.6	Portugal5
Notonecta	Portugal	8.1	7	Portugal5
Notonecta	Portugal	8.8	7.7	Portugal5
Notonecta	Portugal	2.5	0.2	Portugal6
Notonecta	Portugal	2.5	0.2	Portugal6
Notonecta	Portugal	2.5	0.7	Portugal6
Notonecta	Portugal	2.6	0.1	Portugal6
Notonecta	Portugal	2.7	0.8	Portugal6
Notonecta	Portugal	3.2	0.6	Portugal6
Notonecta	Portugal	3.2	0.4	Portugal6
Notonecta	Portugal	3.4	0.2	Portugal6
Notonecta	Portugal	3.5	0.7	Portugal6
Notonecta	Portugal	3.6	0.8	Portugal6
Notonecta	Portugal	3.7	1	Portugal6
Notonecta	Portugal	3.7	0.7	Portugal6
Notonecta	Portugal	4.2	1.4	Portugal6
Notonecta	Portugal	4.5	0.9	Portugal6
Notonecta	Portugal	4.5	0.9	Portugal6
Notonecta	Portugal	4.5	0.8	Portugal6
Notonecta	Portugal	4.6	1.2	Portugal6
Notonecta	Portugal	4.6	1.6	Portugal6
Notonecta	Portugal	4.6	1.4	Portugal6
Notonecta	Portugal	4.7	1.3	Portugal6
Notonecta	Portugal	4.7	1.1	Portugal6
Notonecta	Portugal	4.7	1.6	Portugal6
Notonecta	Portugal	4.8	1.6	Portugal6
Notonecta	Portugal	4.8	1.8	Portugal6
Notonecta	Portugal	4.8	1.6	Portugal6
Notonecta	Portugal	4.9	1.6	Portugal6
Notonecta	Portugal	4.9	2	Portugal6
Notonecta	Portugal	4.9	2.2	Portugal6
Notonecta	Portugal	5	1.6	Portugal6
Notonecta	Portugal	5	1.6	Portugal6
Notonecta	Portugal	5	2.3	Portugal6
Notonecta	Portugal	5.1	1.1	Portugal6
Notonecta	Portugal	5.7	1.8	Portugal6
Notonecta	Portugal	5.9	2.3	Portugal6
Notonecta	Portugal	5.9	2.2	Portugal6
Notonecta	Portugal	5.9	1.9	Portugal6
Notonecta	Portugal	6	2.7	Portugal6
Notonecta	Portugal	6	1.9	Portugal6
Notonecta	Portugal	6	1.9	Portugal6
Notonecta	Portugal	6.1	2.6	Portugal6
Notonecta	Portugal	6.1	1.6	Portugal6
Notonecta	Portugal	6.1	2.5	Portugal6
Notonecta	Portugal	6.2	1.9	Portugal6
Notonecta	Portugal	6.2	2.5	Portugal6
Notonecta	Portugal	6.2	3.3	Portugal6
Notonecta	Portugal	6.3	2.3	Portugal6
Notonecta	Portugal	6.3	4.3	Portugal6
Notonecta	Portugal	6.3	2.3	Portugal6
Notonecta	Portugal	6.4	3.5	Portugal6
Notonecta	Portugal	6.4	3.7	Portugal6
Notonecta	Portugal	6.4	2.4	Portugal6
Notonecta	Portugal	6.5	3.1	Portugal6
Notonecta	Portugal	6.5	2.4	Portugal6
Notonecta	Portugal	6.5	3.4	Portugal6
Notonecta	Portugal	6.6	4.4	Portugal6
Notonecta	Portugal	6.6	2.8	Portugal6
Notonecta	Portugal	6.6	3.7	Portugal6
Notonecta	Portugal	6.7	3.7	Portugal6
Notonecta	Portugal	6.7	3.3	Portugal6
Notonecta	Portugal	6.7	4.3	Portugal6
Notonecta	Portugal	6.8	4.4	Portugal6
Notonecta	Portugal	6.8	3.7	Portugal6
Notonecta	Portugal	6.9	4.8	Portugal6
Notonecta	Portugal	6.9	4.7	Portugal6
Notonecta	Portugal	7.9	6.2	Portugal6
Notonecta	Portugal	8	6.4	Portugal6
Notonecta	Portugal	8	5.4	Portugal6
Notonecta	Portugal	8.3	6.9	Portugal6
Notonecta	Portugal	8.3	4.7	Portugal6
Notonecta	Portugal	8.6	4.7	Portugal6
Notonecta	Portugal	9	8.6	Portugal6
Notonecta	Portugal	10.4	15.7	Portugal6
Notonecta	Portugal	10.6	16.7	Portugal6
Notonecta	Portugal	2.4	0.3	Portugal7
Notonecta	Portugal	2.8	0.3	Portugal7
Notonecta	Portugal	2.9	0.1	Portugal7
Notonecta	Portugal	3	0.2	Portugal7
Notonecta	Portugal	3	0.4	Portugal7
Notonecta	Portugal	3.1	0.1	Portugal7
Notonecta	Portugal	3.8	0.6	Portugal7
Notonecta	Portugal	4.2	0.6	Portugal7
Notonecta	Portugal	4.3	0.5	Portugal7
Notonecta	Portugal	4.3	0.9	Portugal7
Notonecta	Portugal	5.8	1.3	Portugal7
Notonecta	Portugal	7.6	4.9	Portugal7
Notonecta	Portugal	7.6	5.3	Portugal7
Notonecta	Portugal	7.7	6.6	Portugal7
Notonecta	Portugal	7.9	5.8	Portugal7
Notonecta	Portugal	3.3	0.6	Portugal8
Notonecta	Portugal	3.9	0.7	Portugal8
Notonecta	Portugal	7.5	4.7	Portugal8
Notonecta	Portugal	8.4	7	Portugal8
Notonecta	Portugal	8.5	6.5	Portugal8
Notonecta	Portugal	10.9	20.7	Portugal8
Notonecta	Portugal	11.8	21.6	Portugal8
Notonecta	Portugal	12	26.4	Portugal8
Notonecta	Portugal	12.1	24	Portugal8
Notonecta	Portugal	12.2	27.1	Portugal8
Notonecta	Portugal	12.2	21	Portugal8
Notonecta	Portugal	12.5	25.7	Portugal8
Notonecta	Portugal	15	30.4	Portugal8
Notonecta	Portugal	15.5	44.4	Portugal8
Notonecta	Portugal	7.2	6	Portugal9
Notonecta	Portugal	7.3	4.8	Portugal9
Notonecta	Portugal	7.4	5.8	Portugal9
Notonecta	Portugal	8.1	7	Portugal9
Notonecta	Portugal	8.9	7.8	Portugal9
Notonecta	Portugal	9.9	5	Portugal9
Notonecta	Portugal	9.9	6.1	Portugal9
Notonecta	Portugal	2.3	0.3	Portugal10
Notonecta	Portugal	2.3	0.4	Portugal10
Dytiscidae	Sweden	7.8	0.4	Sweden2
Dytiscidae	Sweden	9.6	1.4	Sweden2
Dytiscidae	Sweden	9.8	2.3	Sweden2
Dytiscidae	Sweden	9.8	0.9	Sweden2
Dytiscidae	Sweden	9.9	3.6	Sweden2
Dytiscidae	Sweden	10	0.9	Sweden2
Dytiscidae	Sweden	10.1	1.6	Sweden2
Dytiscidae	Sweden	10.2	0.9	Sweden2
Dytiscidae	Sweden	10.4	3.5	Sweden2
Dytiscidae	Sweden	10.5	1.4	Sweden2
Dytiscidae	Sweden	10.6	1.2	Sweden2
Dytiscidae	Sweden	10.8	1.9	Sweden2
Dytiscidae	Sweden	10.8	0.9	Sweden2
Dytiscidae	Sweden	11	2.5	Sweden2
Dytiscidae	Sweden	11.2	1	Sweden2
Dytiscidae	Sweden	11.3	2.5	Sweden2
Dytiscidae	Sweden	11.4	3.7	Sweden2
Dytiscidae	Sweden	11.6	1.3	Sweden2
Dytiscidae	Sweden	11.6	2.1	Sweden2
Dytiscidae	Sweden	11.7	3.7	Sweden2
Dytiscidae	Sweden	11.9	0.9	Sweden2
Dytiscidae	Sweden	12.4	1.2	Sweden2
Dytiscidae	Sweden	12.7	1.3	Sweden2
Dytiscidae	Sweden	12.8	1.8	Sweden2
Dytiscidae	Sweden	13	1.4	Sweden2
Dytiscidae	Sweden	13.1	0.8	Sweden2
Dytiscidae	Sweden	13.3	2.5	Sweden2
Dytiscidae	Sweden	13.3	3	Sweden2
Dytiscidae	Sweden	13.4	2.1	Sweden2
Dytiscidae	Sweden	13.5	1.9	Sweden2
Dytiscidae	Sweden	13.5	5.4	Sweden2
Dytiscidae	Sweden	13.8	1.8	Sweden2
Dytiscidae	Sweden	14	2	Sweden2
Dytiscidae	Sweden	7.6	1	Sweden5
Dytiscidae	Sweden	8	1.1	Sweden5
Dytiscidae	Sweden	8.5	0.8	Sweden5
Dytiscidae	Sweden	8.7	1.3	Sweden5
Dytiscidae	Sweden	8.7	1.1	Sweden5
Dytiscidae	Sweden	8.9	1	Sweden5
Dytiscidae	Sweden	9.3	2.9	Sweden5
Dytiscidae	Sweden	9.3	1.2	Sweden5
Dytiscidae	Sweden	9.7	0.5	Sweden5
Dytiscidae	Sweden	10	1.6	Sweden5
Dytiscidae	Sweden	10	2.6	Sweden5
Dytiscidae	Sweden	10.3	1.8	Sweden5
Dytiscidae	Sweden	10.7	2.6	Sweden5
Dytiscidae	Sweden	11.1	2.3	Sweden5
Dytiscidae	Sweden	11.5	1.1	Sweden5
Dytiscidae	Sweden	11.6	2.2	Sweden5
Dytiscidae	Sweden	11.6	3.2	Sweden5
Dytiscidae	Sweden	11.9	1.6	Sweden5
Dytiscidae	Sweden	12	4.3	Sweden5
Dytiscidae	Sweden	12.1	2	Sweden5
Dytiscidae	Sweden	12.3	1.9	Sweden5
Dytiscidae	Sweden	12.6	2	Sweden5
Dytiscidae	Sweden	12.7	1.7	Sweden5
Dytiscidae	Sweden	13.2	3	Sweden5
Dytiscidae	Sweden	8.6	0.3	Sweden2
Dytiscidae	Sweden	11.4	0.7	Sweden2
Dytiscidae	Sweden	11.7	0.4	Sweden2
Dytiscidae	Sweden	11.8	0.6	Sweden2
Dytiscidae	Sweden	11.9	0.8	Sweden2
Dytiscidae	Sweden	12.4	0.6	Sweden2
Dytiscidae	Sweden	13.5	0.8	Sweden2
Dytiscidae	Sweden	15.2	0.8	Sweden2
Dytiscidae	Sweden	16.3	1.3	Sweden2
Dytiscidae	Sweden	18.8	3	Sweden2
Dytiscidae	Sweden	20.2	1.6	Sweden2
Dytiscidae	Sweden	22.8	5	Sweden2
Dytiscidae	Sweden	23.3	3.2	Sweden2
Dytiscidae	Sweden	25	7.3	Sweden2
Dytiscidae	Sweden	26.5	5.4	Sweden2
Dytiscidae	Sweden	29.5	5.9	Sweden2
Dytiscidae	Sweden	32.7	11.6	Sweden2
Dytiscidae	Sweden	33.1	25.3	Sweden2
Dytiscidae	Sweden	36.7	24.6	Sweden2
Dytiscidae	Sweden	40	16.3	Sweden2
Dytiscidae	Sweden	11.6	1.4	Sweden5
Dytiscidae	Sweden	13.9	1.4	Sweden5
Dytiscidae	Sweden	17.1	1.6	Sweden5
Dytiscidae	Sweden	28.2	15.5	Sweden5
Dytiscidae	Sweden	13.1	0.9	Sweden3
Dytiscidae	Sweden	8.1	0.6	Sweden5
Dytiscidae	Sweden	9.7	0.5	Sweden5
Dytiscidae	Sweden	12.4	0.9	Sweden5
Dytiscidae	Sweden	15.1	1.2	Sweden5
Dytiscidae	Portugal	18.6	0.8	Portugal4
Dytiscidae	Portugal	20.3	1.7	Portugal4
Dytiscidae	Portugal	24.4	3.2	Portugal4
Dytiscidae	Portugal	26.1	3	Portugal4
Dytiscidae	Portugal	26.4	3.3	Portugal4
Dytiscidae	Portugal	32.8	10.9	Portugal4
Dytiscidae	Portugal	34.6	13.1	Portugal4
Dytiscidae	Portugal	35.7	19.8	Portugal4
Dytiscidae	Portugal	39.6	20.4	Portugal4
Dytiscidae	Portugal	44.3	27.9	Portugal4
Dytiscidae	Portugal	18.4	0.7	Portugal6
Dytiscidae	Portugal	25.6	2.9	Portugal6
Dytiscidae	Portugal	18.1	1.3	Portugal7
Dytiscidae	Portugal	16.2	1	Portugal8
Dytiscidae	Portugal	16.7	1.3	Portugal8
Dytiscidae	Portugal	16.9	0.8	Portugal8
Dytiscidae	Portugal	17.9	0.9	Portugal8
Dytiscidae	Portugal	19	0.9	Portugal8
Dytiscidae	Portugal	19.3	1	Portugal8
Dytiscidae	Portugal	26	5.6	Portugal8
Dytiscidae	Portugal	28.2	6.3	Portugal8
Dytiscidae	Portugal	21.4	3.3	Portugal9
Dytiscidae	Portugal	22	4.9	Portugal9
Dytiscidae	Portugal	3.6	0.4	Portugal3
Dytiscidae	Portugal	4.2	0.6	Portugal3
Dytiscidae	Portugal	5.9	1.1	Portugal3
Dytiscidae	Portugal	3.2	0.3	Portugal4
Dytiscidae	Portugal	4.2	0.3	Portugal4
Dytiscidae	Portugal	6	0.9	Portugal4
Dytiscidae	Portugal	6.4	1	Portugal4
Dytiscidae	Portugal	5.2	0.7	Portugal5
Dytiscidae	Portugal	5.4	0.6	Portugal5
Dytiscidae	Portugal	5.6	1.3	Portugal5
Dytiscidae	Portugal	6.1	0.9	Portugal5
Dytiscidae	Portugal	6.5	0.8	Portugal5
Dytiscidae	Portugal	2.7	0.5	Portugal6
Dytiscidae	Portugal	3.2	0.4	Portugal6
Dytiscidae	Portugal	3.4	0.5	Portugal6
Dytiscidae	Portugal	3.9	0.4	Portugal6
Dytiscidae	Portugal	4.4	0.6	Portugal6
Dytiscidae	Portugal	4.5	0.4	Portugal6
Dytiscidae	Portugal	4.5	0.8	Portugal6
Dytiscidae	Portugal	4.6	0.9	Portugal6
Dytiscidae	Portugal	4.8	0.7	Portugal6
Dytiscidae	Portugal	4.9	0.9	Portugal6
Dytiscidae	Portugal	4.9	1.1	Portugal6
Dytiscidae	Portugal	5	1	Portugal6
Dytiscidae	Portugal	5	0.9	Portugal6
Dytiscidae	Portugal	5.1	0.8	Portugal6
Dytiscidae	Portugal	5.3	1.2	Portugal6
Dytiscidae	Portugal	5.3	0.7	Portugal6
Dytiscidae	Portugal	5.3	0.9	Portugal6
Dytiscidae	Portugal	5.4	0.6	Portugal6
Dytiscidae	Portugal	5.5	0.8	Portugal6
Dytiscidae	Portugal	5.6	1.1	Portugal6
Dytiscidae	Portugal	5.7	0.3	Portugal6
Dytiscidae	Portugal	5.9	1	Portugal6
Dytiscidae	Portugal	6	0.4	Portugal6
Dytiscidae	Portugal	6.4	1.1	Portugal6
Dytiscidae	Portugal	7.3	0.6	Portugal6
Dytiscidae	Portugal	4.2	0.4	Portugal7
Dytiscidae	Portugal	4.3	0.3	Portugal7
Dytiscidae	Portugal	4.3	0.4	Portugal7
Dytiscidae	Portugal	4.5	0.5	Portugal7
Dytiscidae	Portugal	4.8	0.3	Portugal7
Dytiscidae	Portugal	4.9	1.1	Portugal7
Dytiscidae	Portugal	5.1	0.6	Portugal7
Dytiscidae	Portugal	5.2	0.5	Portugal7
Dytiscidae	Portugal	5.5	0.7	Portugal7
Dytiscidae	Portugal	6.7	0.9	Portugal8
Dytiscidae	Portugal	7.2	1.6	Portugal8
Dytiscidae	Portugal	7.3	0.7	Portugal8
Dytiscidae	Portugal	4.6	0.4	Portugal10
Dytiscidae	Portugal	4.6	0.6	Portugal10
Dytiscidae	Portugal	4.8	0.5	Portugal10
Dytiscidae	Portugal	5.7	0.8	Portugal10
Dytiscidae	Portugal	5.7	1	Portugal10
Dytiscidae	Portugal	6.2	0.6	Portugal10
Dytiscidae	Portugal	6.5	0.7	Portugal10
Dytiscidae	Portugal	6.5	0.8	Portugal10
Dytiscidae	Portugal	6.8	0.4	Portugal10
Asellus	Sweden	4.3	0.3	Sweden1
Asellus	Sweden	4.9	0.5	Sweden1
Asellus	Sweden	4.6	0.7	Sweden1
Asellus	Sweden	5	0.3	Sweden1
Asellus	Sweden	4	0.2	Sweden1
Asellus	Sweden	4.5	0.2	Sweden1
Asellus	Sweden	4.4	0.3	Sweden1
Asellus	Sweden	3	0.1	Sweden1
Asellus	Sweden	4.4	0.3	Sweden1
Asellus	Sweden	5.2	0.6	Sweden1
Asellus	Sweden	4.7	0.7	Sweden1
Asellus	Sweden	4.5	0.3	Sweden1
Asellus	Sweden	5.4	0.4	Sweden1
Asellus	Sweden	4.2	0.1	Sweden1
Asellus	Sweden	5.5	0.5	Sweden1
Asellus	Sweden	5	0.7	Sweden1
Asellus	Sweden	4.5	0.4	Sweden1
Asellus	Sweden	4.3	0.7	Sweden1
Asellus	Sweden	5.2	0.7	Sweden1
Asellus	Sweden	4.9	0.6	Sweden1
Asellus	Sweden	5.7	0.8	Sweden1
Asellus	Sweden	7.3	1.5	Sweden1
Asellus	Sweden	6.5	1	Sweden1
Asellus	Sweden	7.2	1.6	Sweden1
Asellus	Sweden	7.3	1.3	Sweden1
Asellus	Sweden	7.2	2.5	Sweden1
Asellus	Sweden	6.5	0.8	Sweden1
Asellus	Sweden	6.7	1.3	Sweden1
Asellus	Sweden	6.2	1.4	Sweden1
Asellus	Sweden	6.3	1.6	Sweden1
Asellus	Sweden	6.8	1.2	Sweden1
Asellus	Sweden	5.6	0.9	Sweden1
Asellus	Sweden	6.3	1.2	Sweden1
Asellus	Sweden	7.5	1.5	Sweden1
Asellus	Sweden	6.1	1.3	Sweden1
Asellus	Sweden	7.1	1.1	Sweden1
Asellus	Sweden	5.8	0.6	Sweden1
Asellus	Sweden	5.3	0.3	Sweden1
Asellus	Sweden	4.8	0.8	Sweden1
Asellus	Sweden	6.6	1.4	Sweden1
Asellus	Sweden	5.1	0.3	Sweden1
Asellus	Sweden	7.1	1.3	Sweden1
Asellus	Sweden	6.2	0.9	Sweden1
Asellus	Sweden	6.9	0.9	Sweden1
Asellus	Sweden	7.9	1.9	Sweden1
Asellus	Sweden	7.8	1.6	Sweden1
Asellus	Sweden	7	1.3	Sweden1
Asellus	Sweden	9.6	5.8	Sweden1
Asellus	Sweden	11.1	6.6	Sweden1
Asellus	Sweden	10.9	6.1	Sweden1
Asellus	Sweden	12.9	8	Sweden1
Asellus	Sweden	5.1	0.7	Sweden2
Asellus	Sweden	2.7	0.1	Sweden2
Asellus	Sweden	3.8	0.2	Sweden2
Asellus	Sweden	6.6	1.1	Sweden2
Asellus	Sweden	6.1	1.1	Sweden2
Asellus	Sweden	8.3	3.1	Sweden2
Asellus	Sweden	9.3	4.8	Sweden2
Asellus	Sweden	10.7	5.9	Sweden2
Asellus	Sweden	9.2	3.8	Sweden2
Asellus	Sweden	10.1	5	Sweden2
Asellus	Sweden	9.1	3.7	Sweden2
Asellus	Sweden	8.9	2.9	Sweden2
Asellus	Sweden	8.6	3.6	Sweden2
Asellus	Sweden	9.3	4.4	Sweden2
Asellus	Sweden	10.4	5.2	Sweden2
Asellus	Sweden	9.8	4.4	Sweden2
Asellus	Sweden	9.5	3.6	Sweden2
Asellus	Sweden	9.8	4.7	Sweden2
Asellus	Sweden	10.2	6.3	Sweden2
Asellus	Sweden	9.4	3.2	Sweden2
Asellus	Sweden	8.9	3.1	Sweden2
Asellus	Sweden	10.8	4.8	Sweden2
Asellus	Sweden	11.5	7.8	Sweden2
Asellus	Sweden	12.7	10	Sweden2
Asellus	Sweden	11.9	8.7	Sweden2
Asellus	Sweden	11.8	5	Sweden2
Asellus	Sweden	12.2	8.5	Sweden2
Asellus	Sweden	11.7	7.2	Sweden2
Asellus	Sweden	10.5	5.8	Sweden2
Asellus	Sweden	14	11.5	Sweden2
Asellus	Sweden	13.4	12.9	Sweden2
Asellus	Sweden	14.4	12.5	Sweden2
Asellus	Sweden	9.9	5	Sweden2
Asellus	Sweden	10.6	5.1	Sweden2
Asellus	Sweden	12	9.2	Sweden2
Asellus	Sweden	9.9	5.5	Sweden2
Asellus	Sweden	11.6	7.6	Sweden2
Asellus	Sweden	11.4	6.9	Sweden2
Asellus	Sweden	11.7	7.3	Sweden2
Asellus	Sweden	14	12.8	Sweden2
Asellus	Sweden	10.5	7.1	Sweden2
Asellus	Sweden	12.9	9	Sweden2
Asellus	Sweden	11.6	6.5	Sweden2
Asellus	Sweden	10.7	4	Sweden2
Asellus	Sweden	12.7	7.8	Sweden2
Asellus	Sweden	8.7	3.4	Sweden2
Asellus	Sweden	11.4	5.8	Sweden2
Asellus	Sweden	11.8	7.7	Sweden2
Asellus	Sweden	10.8	6.1	Sweden2
Asellus	Sweden	10.3	5.6	Sweden2
Asellus	Sweden	4.1	0.2	Sweden2
Asellus	Sweden	3.5	0.3	Sweden2
Asellus	Sweden	4.8	0.4	Sweden2
Asellus	Sweden	3.2	0.1	Sweden2
Asellus	Sweden	2.4	0.1	Sweden2
Asellus	Sweden	3.7	0.3	Sweden2
Asellus	Sweden	2.9	0.2	Sweden2
Asellus	Sweden	12.6	11.4	Sweden2
Asellus	Sweden	12.5	8.8	Sweden2
Asellus	Sweden	11.3	9.1	Sweden2
Asellus	Sweden	13.4	12.2	Sweden2
Asellus	Sweden	13	11.5	Sweden2
Asellus	Sweden	12.4	7.6	Sweden2
Asellus	Sweden	12.1	7.6	Sweden2
Asellus	Sweden	12.8	10.7	Sweden2
Asellus	Sweden	12.6	8.5	Sweden2
Asellus	Sweden	14.1	11.4	Sweden2
Asellus	Sweden	13.7	10.9	Sweden2
Asellus	Sweden	12.3	7.9	Sweden2
Asellus	Sweden	13	9.2	Sweden2
Asellus	Sweden	12.8	10.8	Sweden2
Asellus	Sweden	11.8	11.7	Sweden2
Asellus	Sweden	12.1	6.6	Sweden2
Asellus	Sweden	4.3	0.4	Sweden3
Asellus	Sweden	3.2	0.2	Sweden3
Asellus	Sweden	3.3	0.4	Sweden3
Asellus	Sweden	2.5	0.1	Sweden3
Asellus	Sweden	3.9	0.2	Sweden3
Asellus	Sweden	4.7	0.2	Sweden3
Asellus	Sweden	3.8	0.3	Sweden3
Asellus	Sweden	3.6	0.1	Sweden3
Asellus	Sweden	7.5	1.9	Sweden3
Asellus	Sweden	8	3.1	Sweden3
Asellus	Sweden	6.8	1.5	Sweden3
Asellus	Sweden	8.4	3.8	Sweden3
Asellus	Sweden	9	3.4	Sweden3
Asellus	Sweden	7	1.6	Sweden3
Asellus	Sweden	9.1	3.3	Sweden3
Asellus	Sweden	9.6	3.2	Sweden3
Asellus	Sweden	10.1	4.5	Sweden3
Asellus	Sweden	9.4	4.9	Sweden3
Asellus	Sweden	9.5	4.1	Sweden3
Asellus	Sweden	10	6.4	Sweden3
Asellus	Sweden	10.3	5.5	Sweden3
Asellus	Sweden	9.7	5	Sweden3
Asellus	Sweden	4.1	0.4	Sweden3
Asellus	Sweden	9.7	4.4	Sweden3
Asellus	Sweden	11.5	6.6	Sweden3
Asellus	Sweden	11.2	7	Sweden3
Asellus	Sweden	11	7.2	Sweden3
Asellus	Sweden	11	7.6	Sweden3
Asellus	Sweden	10.4	6	Sweden3
Asellus	Sweden	16	15	Sweden3
Asellus	Sweden	11.3	5.4	Sweden3
Asellus	Sweden	11.2	7.6	Sweden3
Asellus	Sweden	14.3	13.6	Sweden3
Asellus	Sweden	3.3	0.133333	Sweden4
Asellus	Sweden	2.5	0.05	Sweden4
Asellus	Sweden	3.6	0.3	Sweden4
Asellus	Sweden	3.1	0.2	Sweden4
Asellus	Sweden	4.2	0.3	Sweden4
Asellus	Sweden	4	0.3	Sweden4
Asellus	Sweden	2.8	0.1	Sweden4
Asellus	Sweden	3	0.1	Sweden4
Asellus	Sweden	3.7	0.4	Sweden4
Asellus	Sweden	2.9	0.2	Sweden4
Asellus	Sweden	9.2	4.4	Sweden4
Asellus	Sweden	8.1	2.4	Sweden4
Asellus	Sweden	8.2	2.7	Sweden4
Asellus	Sweden	9	3.8	Sweden4
Asellus	Sweden	10.2	4.8	Sweden4
Asellus	Sweden	7.6	2.4	Sweden4
Asellus	Sweden	7.4	2.6	Sweden4
Asellus	Sweden	8.2	2.5	Sweden4
Asellus	Sweden	7.4	1.9	Sweden4
Asellus	Sweden	8.1	2.5	Sweden4
Asellus	Sweden	7.9	3	Sweden4
Asellus	Sweden	7.8	3	Sweden4
Asellus	Sweden	8.4	3	Sweden4
Asellus	Sweden	8.3	2.3	Sweden4
Asellus	Sweden	8.5	3.3	Sweden4
Asellus	Sweden	8.5	3	Sweden4
Asellus	Sweden	8.7	4	Sweden4
Asellus	Sweden	8	2.5	Sweden4
Asellus	Sweden	7.7	2.8	Sweden4
Asellus	Sweden	13.8	11.6	Sweden4
Asellus	Sweden	11	6.8	Sweden4
Asellus	Sweden	10.9	5.8	Sweden4
Asellus	Sweden	12	6.9	Sweden4
Asellus	Sweden	12.2	7.5	Sweden4
Asellus	Sweden	11.9	6.7	Sweden4
Asellus	Sweden	10	6.5	Sweden4
Asellus	Sweden	10.6	6.4	Sweden4
Asellus	Sweden	4.6	0.9	Sweden5
Asellus	Sweden	5.2	1.1	Sweden5
Asellus	Sweden	5	0.6	Sweden5
Asellus	Sweden	5.3	1	Sweden5
Asellus	Sweden	4.4	0.3	Sweden5
Asellus	Sweden	5.6	1.2	Sweden5
Asellus	Sweden	4.9	0.8	Sweden5
Asellus	Sweden	4.6	0.9	Sweden5
Asellus	Sweden	5.4	0.5	Sweden5
Asellus	Sweden	5.5	1.2	Sweden5
Asellus	Sweden	6.4	1.5	Sweden5
Asellus	Sweden	6	1.3	Sweden5
Asellus	Sweden	6	1.1	Sweden5
Asellus	Sweden	6.4	1.3	Sweden5
Asellus	Sweden	5.8	1.2	Sweden5
Asellus	Sweden	5.7	1.2	Sweden5
Asellus	Sweden	6.7	1.7	Sweden5
Naucoris	Portugal	1.2	0.1	Portugal3
Naucoris	Portugal	1.3	0.4	Portugal3
Naucoris	Portugal	2.3	0.2	Portugal3
Naucoris	Portugal	2.5	0.1	Portugal3
Naucoris	Portugal	3.2	0.3	Portugal3
Naucoris	Portugal	3.3	0.7	Portugal3
Naucoris	Portugal	3.3	0.8	Portugal3
Naucoris	Portugal	3.3	0.6	Portugal3
Naucoris	Portugal	3.4	0.9	Portugal3
Naucoris	Portugal	3.4	1.2	Portugal3
Naucoris	Portugal	3.4	0.3	Portugal3
Naucoris	Portugal	3.5	0.6	Portugal3
Naucoris	Portugal	3.5	0.8	Portugal3
Naucoris	Portugal	4.2	2	Portugal3
Naucoris	Portugal	4.3	1.2	Portugal3
Naucoris	Portugal	4.3	1.9	Portugal3
Naucoris	Portugal	4.3	1.3	Portugal3
Naucoris	Portugal	4.4	1.2	Portugal3
Naucoris	Portugal	4.4	2.2	Portugal3
Naucoris	Portugal	4.4	1.8	Portugal3
Naucoris	Portugal	4.5	1.2	Portugal3
Naucoris	Portugal	4.5	1.1	Portugal3
Naucoris	Portugal	4.6	1.4	Portugal3
[truncated: 57 more rows]
